## **Coherent theta activity in the medial and orbital frontal cortices encodes reward value**

Linda M. Amarante and Mark Laubach \*

Department of Neuroscience, American University, Washington, DC, USA

\*Corresponding author:

Mark Laubach, PhD

Department of Neuroscience

American University

4400 Massachusetts Avenue NW

Washington, DC 20016

mark.laubach@american.edu

Acknowledgments: We thank Wambura Fobbs, Alexxai Kravitz, Catherine Stoodley, Steve Wise, and Samantha White for helpful feedback on the manuscript.

Conflict of Interest: None

Financial Support: NIH DA046375 to ML and a NSF Graduate Research Fellowship to LMA.

5 ABSTRACT

6 This study examined how the medial frontal (MFC) and orbital frontal (OFC) cortices process  
7 reward information. We simultaneously recorded local field potentials in the two areas as rats  
8 consumed liquid sucrose rewards. Both areas exhibited a 4-8 Hz “theta” rhythm that was phase  
9 locked to the lick cycle. The rhythm tracked shifts in sucrose concentrations and fluid volumes,  
10 demonstrating that it is sensitive to differences in reward magnitude. The coupling between the  
11 rhythm and licking was stronger in MFC than OFC and varied with response vigor and absolute  
12 reward value in the MFC. Spectral analysis revealed zero-lag coherence between the cortical  
13 areas, and found evidence for a directionality of the rhythm, with MFC leading OFC. Our  
14 findings suggest that consummatory behavior generates simultaneous theta range activity in the  
15 MFC and OFC that encodes the value of consumed fluids, with the MFC having a top-down role  
16 in the control of consumption.

## 17 INTRODUCTION

18           The medial and orbital frontal cortices (MFC and OFC) are two of the most studied parts  
19 of the cerebral cortex for their role in value-guided decision making, a process that ultimately  
20 results in animals consuming rewarding foods or fluids. There are extensive anatomical  
21 connections between the various parts of the MFC and OFC in rodents (Gabbott et al., 2003;  
22 Gabbott et al., 2005; Barreiros et al., 2020), and the regions are part of the medial frontal  
23 network (Öngür and Price, 2000). The MFC and OFC are thought to have specific roles in the  
24 control of behavior and specific homologies with medial and orbital regions of the primate frontal  
25 cortex (MFC: Laubach et al., 2018; OFC: Izquierdo, 2017). The extensive interconnections  
26 between MFC and OFC suggest that the two regions work together to control value-guided  
27 decisions. Unfortunately, few, if any, studies have examined concurrent neural processing in  
28 these regions of the rodent brain as animals perform behavioral tasks that depend on the two  
29 cortical regions.

30           In standard laboratory tasks, the action selection and outcome evaluation phases of  
31 value-guided decisions are commonly conceived as separate processes (Rangel et al., 2008).  
32 MFC and OFC may contribute independently to these processes or interact concurrently across  
33 them. Though there is some variation across published studies, most argue for MFC having a  
34 role in action-outcome processing (Alexander and Brown, 2011; Simon et al., 2015) and OFC  
35 having a role in stimulus-outcome (stimulus-reward) processing (Gallagher et al., 1999;  
36 Schoenbaum and Roesch, 2005; Simon et al., 2015). The present study directly compared  
37 neural activity in the MFC and OFC of rats as they performed a simple consummatory task,  
38 called the Shifting Values Licking Task, or SVLT (Parent et al., 2015a). Importantly, the task  
39 depends on the ability of animals to guide their consummatory behavior based on the value of  
40 available rewards, and performance of these kinds of tasks depends on both the MFC (Parent  
41 et al., 2015a,b) and OFC (Kesner and Glibert, 2007). The goal of the study was to use the SVLT

42 to determine if the MFC and OFC have distinct roles in processing reward information, e.g.  
43 varying with action (licking) in MFC and the sensory properties of the rewards in OFC.

44 Most published studies on reward processing used operant designs with distinct actions  
45 preceding different outcomes. For example, a rat might respond in one of two choice ports to  
46 produce a highly valued reward, delivered from a separate reward port. To collect the reward,  
47 the rat has to travel across an operant chamber and then collect a food pellet or initiate licking  
48 on a spout to collect the reward. In such tasks (Pratt and Mizumori, 2001; van Durren et al.,  
49 2009; van Wiingerden et al., 2010; Riceberg and Shapiro, 2017; Jarovi et al., 2018; Siniscalchi  
50 et al., 2019), neural activity during the period of consumption might reflect the properties of the  
51 reward, how the animal consumes it, and/or the behaviors that precede reward collection (e.g.  
52 locomotion). As such, it is difficult to isolate reward specific activity using such operant designs.

53 Several published studies have used simpler consummatory and Pavlovian designs, and  
54 found neural activity in the MFC is selectively modulated during active consumption (Petykó et  
55 al., 2009; Horst and Laubach, 2013; Petykó et al., 2015). None of these tasks used fluids with  
56 different reward values. Amarante et al. (2017) was the first study to examine if similar neural  
57 activity was associated with animals consuming different magnitudes of reward. The study used  
58 the SVLT and presented rats with rewards that differed in terms of the concentration of sucrose  
59 contained in the rewarding fluids. The study found that neural activity in the MFC is entrained to  
60 the animals' lick cycle and the strength of entrainment varies with the value of the rewarding  
61 fluid, i.e. stronger entrainment with higher value reward. The study also used reversible  
62 inactivation methods to demonstrate that licking entrainment depends on the MFC.

63 In the present study, we used the SVLT, and several variations on the basic task design,  
64 to study consumption related activity in MFC and OFC. Spectral analyses were used to account  
65 for the extent to which neural activity in each area was entrained to licking and if there was  
66 evidence for directionality of lick-entrainment among sites in the MFC and OFC. A custom

67 designed syringe pump was used to deliver different volumes of fluid over a common time  
68 period (Amarante et al., 2019). This device allowed us to directly compare neural activity  
69 associated with differences in sucrose concentration and fluid volume. We further manipulated  
70 the predictability of changes in reward magnitude to assess how predictable and unpredictable  
71 rewards are processed and used a third, intermediate level of reward to assess if reward  
72 magnitudes are encoded in a relative or absolute manner. Our findings suggest that both areas  
73 encode the value of consumed fluids and that the MFC may have a top-down role in  
74 coordinating reward processing.

75

## 76 RESULTS

### 77 *Shifting Values Licking Task: Effects of reward magnitude on consummatory behavior*

78         The Shifting Values Licking Task (Amarante et al., 2017; Figure 1A) was used to assess  
79 reward encoding across the MFC and OFC as 12 rats experienced shifts in reward value  
80 defined by differences in sucrose concentration or fluid volume. Shifts in concentration were  
81 between 16% and 4% sucrose in a volume of 30  $\mu$ L. Shifts in volume were between 30  $\mu$ L and  
82 10  $\mu$ L containing 16% sucrose. Concentrations and volumes alternated over periods of 30 sec  
83 (Figure 1B, left). LFP activity was recorded from 16-channel multi-electrode arrays in the MFC in  
84 10 of the 12 rats and OFC in 6 of the 12 rats (recording locations are shown in Figure 1 - figure  
85 supplement 1).

86         Several measures of licking behavior varied with sucrose concentration or fluid volume:  
87 lick counts, inter-lick intervals, lick rate, and bout duration (Figure 1C). All rats licked  
88 more for the high concentration reward compared to the low concentration reward (paired t-test;  
89  $t(11)=10.76$ ,  $p<0.001$ ) (Figure 1D). Rats also licked at a faster rate for the high concentration  
90 reward compared to the low concentration reward (paired t-test;  $t(11)=6.347$ ,  $p<0.001$ ) (Figure  
91 1E). Additionally, rats had increased bout durations when licking for the high concentration

92 reward compared to the low concentration reward (paired t-test:  $t(11)=2.943$ ,  $p=0.013$ ) (Figure  
93 1F). There was no difference in variability of high or low concentration licks: the coefficient of  
94 variation for inter-lick intervals was the same (paired t-test:  $t(9)=0.864$ ,  $p=0.41$ ).

95 Rats behaved similarly when consuming the high concentration and large volume  
96 rewards. In volume manipulation sessions, rats emitted more licks for the large reward than the  
97 small reward (paired t-test;  $t(11)=4.99$ ,  $p<0.001$ ). However, this difference in lick counts was  
98 less robust than the difference in high and low concentration rewards during concentration  
99 manipulation sessions (Figure 1D). Rats licked at a faster rate for large rewards compared to  
100 small volume rewards (paired t-test;  $t(11)=6.311$ ,  $p<0.001$ ) (Figure 1E), and licking bouts were  
101 longer for large rewards compared to bouts to consume small rewards (Figure 1F), (paired t-  
102 test;  $t(11)=2.569$ ,  $p=0.027$ ).

103

#### 104 *Shifting Values Licking Task: Coherent fluctuations in the theta range in the MFC and OFC*

105 LFPs in the MFC (N=56) and OFC (N=64) from 4 rats with arrays implanted in both  
106 cortical areas were recorded during the standard Shifting Values Licking Task. The LFPs were  
107 analyzed with cross-correlation and a spectral method called directed coherence to assess the  
108 extent of coordinated fluctuations between the cortical regions (Figure 2A). Data from all rats  
109 tested with both shifts in sucrose concentration and fluid volume were used for this analysis.  
110 One of the rats had 16 LFPs recorded in each area (256 pairs). Two rats had 14 LFPs in MFC  
111 and 16 in OFC (224 pairs). The fourth rat had 12 LFPs in MFC and 16 in OFC (192 pairs). Data  
112 from a total of 896 electrode pairs were analyzed. As shown in Figure 2B, LFPs from both areas  
113 showed frank fluctuations during periods of sustained licking (bouts). Standard (non-directional)  
114 coherence for the LFPs peaked around a value of 0.6 near the licking frequency (Figure 2C). By  
115 measuring cross-correlation over a range of lags (time-domain directionality), we found

116 evidence for near zero-lag correlations. (This analysis is done in the time domain and does not  
117 account for frequency-specific directional influences.)

118 Directed coherence values at the licking frequency were larger for MFC leading OFC  
119 compared to OFC leading MFC (Figure 2E). Notably, the magnitude of the coherence was no  
120 more than 0.2, suggesting a potential weak influence of MFC on the timing of fluctuations in  
121 OFC. The magnitude of the coherences were variable over electrodes, and plots of the  
122 measures onto the anatomical arrangement of the recording arrays revealed a gradient of  
123 directed coherence, with most rostral sites in MFC having larger coherence values compared to  
124 caudal sites (an example is shown in Figure 2F).

125 To further examine the role of spatial location on directed coherence, we denoted the  
126 locations of the recordings along the arrays as rostral or caudal (i.e. for each linear array with 8  
127 electrodes, the four most rostral electrodes were denoted as rostral and the rest as caudal). An  
128 example of directed coherence over frequencies up to 30 Hz for the rostral and caudal sites  
129 (Figure 2B) is shown in Figure 2G. Directed coherence was larger for the direction MFC →  
130 OFC for most rostral electrode in the MFC and both the rostral and caudal electrodes in the  
131 OFC. The caudal electrode in the MFC had larger directed coherence for the direction MFC →  
132 OFC for the caudal, but not the rostral, electrode in OFC. A group summary of these findings, at  
133 the licking frequency, is shown in Figure 2H. Here, the locations of the electrodes was further  
134 split as medial and lateral, and differences in directed coherence were apparent for rostral and  
135 caudal sites in the MFC and medial sites in the OFC (right half of the plot). Directed coherence  
136 was equivocal for rostral and caudal sites in the MFC and lateral sites in the OFC (left half of the  
137 plot). Based on anatomical mapping of the arrays, the medial and lateral sites in the OFC were  
138 associated with the deep and superficial layers of the cortex, respectively. These findings  
139 suggest cross-laminar differences in the timing of the LFP fluctuations, with the rostral part of

140 the MFC “driving” fluctuations in the deep layers of the OFC, and possibly serving as feedback  
141 from the MFC to the OFC (Gabbott et al., 2003).

142

143 *Shifting Values Licking Task: Lick entrainment in MFC and OFC tracks reward magnitude*

144 We next aimed to determine if there were electrophysiological differences in MFC and  
145 OFC during access to the different types of rewards. Lick-field coherence (using methods  
146 originally developed for spike-field coherence in the Neurospec library for Matlab, Halliday et al.,  
147 1995). LFPs from both areas were coherent with licks at the licking frequency, and not at higher  
148 harmonic frequencies of licking (Figure 3A). Coherence levels were higher for licks that  
149 delivered high value fluid (concentration and volume) compared to low value fluid in MFC  
150 (paired t-test; Concentration:  $t(95)=39.972$ ,  $p<0.001$ ; Volume:  $t(95)=11.643$ ,  $p<0.001$ ) and  
151 OFC (paired t-test: Concentration:  $t(91)=17.386$ ,  $p<0.001$ ; Volume:  $t(91)=18.970$ ,  $p<0.001$ )  
152 (Figure 3A-B). Furthermore, coherence was higher for high-value licks in the concentration shift  
153 sessions compared to the volume shift sessions in MFC (paired t-test;  $t(95)=6.901$ ,  $p<0.001$ ),  
154 but not the OFC (paired t-test;  $t(91)=-0.401$ ,  $p=0.688$ ). Phase angles at the licking frequency are  
155 shown in Figure 3C. With lick-field coherence ranging between 0 and 0.5, this analysis suggests  
156 that the LFP fluctuations at the licking frequency are only partially accounted for by the animals’  
157 licking behavior and the extent of entrainment differs between cortical areas (larger in MFC) and  
158 is sensitive to reward value (larger for higher value fluid).

159 Three additional measurements of local field potential (LFP) activity were examined:  
160 amplitude (as measured by the size of Event-Related Potentials (ERP); Figure 4 - figure  
161 supplement 1A), spectral power (as measured by Event-Related Spectral Power (ERSP); Figure  
162 4 - figure supplement 1B), and phase (as measured by Inter-Trial Coherence (ITC), Figure 4 -  
163 figure supplement 1C). Similar to results from lick-field coherence, we found lick-entrained



164 activity in MFC and OFC that varied with both differences in sucrose concentration and fluid  
165 volume (Figure 4). Event-related potentials showed evidence for time-locked rhythmic  
166 fluctuations in LFPs from both cortical areas (Figure 4B,F). Both cortical areas showed elevated  
167 ITC between 4 and 8 Hz for licks that delivered the high concentration liquid sucrose but not the  
168 low concentration sucrose (Figure 4C,G). That is, the phase angles of the LFP fluctuations at  
169 the times of licks were more consistent when rats consumed the high concentration fluid  
170 compared to the low concentration fluid. This result was observed in all rats that were tested  
171 (dark blue lines in Figure 4D,H) (MFC:  $F(1,278)=443$ ,  $p<0.001$ ; OFC:  $F(1,177)=77.31$ ,  $p<0.001$ ;  
172 one-way ANOVAs with an error term for within-subject variation). Analysis of phase coherence  
173 (Figure 4 - figure supplement 1D) and event-related power (Figure 4 - figure supplement 1E)  
174 revealed effects solely in the 4-8 Hz (theta) frequency range.

175 To assess differences in power, we used a peak-to-peak analysis of ERPs during licks  
176 for the high-value and low-value rewards. The measure calculates the difference in the  
177 maximum and minimum ERP amplitude using a window centered around each lick. The size of  
178 the window was twice each rat's median inter-lick interval. LFPs in MFC showed increased  
179 amplitudes for high concentration rewards, as opposed to low concentration rewards (one-way  
180 ANOVA:  $F(1,278)=34.19$ ,  $p<0.001$ ). Figure 4B shows MFC ERPs for high and low concentration  
181 rewards of an example rat. This effect was not significant in OFC ERPs, as seen in Figure 4F  
182 ( $F(1,177)=0.557$ ,  $p=0.456$ ). We also measured ERSP, and although there was a decrease in  
183 MFC power from licks for the high to low concentration rewards specifically in the 4-8 Hz range  
184 ( $F(1,278)=18.72$ ,  $p<0.001$ ; one-way ANOVA), post-hoc testing revealed no relevant significance  
185 between high and low concentration licks ( $p=0.413$ ). There was no major difference in ERSP  
186 measures in OFC ( $F(1,177)=0.039$ ,  $p=0.843$ ).

187 In sessions with shifts in fluid volume, event-related potentials in MFC or OFC did not  
188 distinguish between large versus small volume rewards (MFC:  $F(1,216)=0.865$ ,  $p=0.354$ ; OFC:

189 (F(1,179)=1.876, p=0.173); one-way ANOVAs) (Figure 4B,F, bottom). There was no major  
190 difference in event-related spectral power during licks for large or small rewards in MFC or OFC  
191 (MFC: F(1,216)=0.877, p=0.35; OFC: F(1,179)=1.76, p=0.186); one-way ANOVAs). However, in  
192 both MFC and OFC, rats showed similar 4-8 Hz phase-locking for large rewards (Figure 4C,G,  
193 bottom), closely resembling what we observed with high concentration rewards (Figure 4C,G,  
194 top). Phase-locking was significantly increased for small rewards (MFC: F(1,216)=138.5,  
195 p<0.001; OFC: F(1,179)=280.8, p<0.001; one-way ANOVA) and was observed in all rats that  
196 were tested (light blue lines in Figure 4D,H).

197         These findings suggest that LFP activity in both MFC and OFC similarly encodes  
198 aspects of preferred versus less preferred reward options. 4-8 Hz phase-locking was strongest  
199 for both the high concentration and large volume rewards, which may be evidence that the  
200 animal is acting within a preferred state with the goal of obtaining their most “valued” reward.  
201 These findings provided further evidence suggesting that the entrainment of neural activity in  
202 MFC and OFC to the lick cycle tracks reward magnitude.

203

204 *Blocked-Interleaved Task: Engagement in and the vigor of licking vary with reward expectation*

205         The same group of 12 rats were subsequently tested in an adjusted version of the  
206 Shifting Values Licking Task, which will be referred to as the Blocked-Interleaved Task (Figure  
207 5A). In the first three minutes of the task, i.e. the “blocked” phase, rats behaviorally showed their  
208 typical differentiation of high versus low concentration rewards by emitting more licks for the  
209 high concentration reward (Figure 5B, left), and licked at a faster rate (Figure 5C, left). However,  
210 this pattern changed when the rewards were randomly presented in the “interleaved” part of the  
211 task. With a randomly interleaved reward presentation, rats licked nearly equally for high and  
212 low concentration rewards (Figure 5B, right; see also Figure 5 - figure supplement 1). We  
213 performed a two-way ANOVA on the number of licks by each lick type (high or low

214 concentration) and portion of the task (blocked or interleaved). There was a significant  
215 interaction between concentration of reward and the blocked or interleaved portion of the task  
216 ( $F(1,33)=24.51$ ,  $p<0.001$ ). Post-hoc analyses revealed that while there was a significant  
217 difference in high and low concentration licks during the blocked portion ( $p<0.001$ ), there was no  
218 difference between high and low concentration licks during the interleaved portion of the task  
219 ( $p=0.98$ ). These findings suggest that shifting from blocked to interleaved presentations of the  
220 two rewards increased the animals' engagement in licking for the lower value fluid.

221         Additionally, there was a significant difference in lick rate by each lick type and portion of  
222 the task ( $F(1,33)=23.13$ ,  $p<0.001$ ; two-way ANOVA) (Figure 5C). Post hoc analyses revealed  
223 that rats licked significantly faster for high versus low concentration rewards during the blocked  
224 portion ( $p<0.005$ ). Lick rates for high versus low concentration licks during the interleaved part  
225 of the task were not significantly different ( $p=0.99$ ). Notably, lick rate during access to either  
226 high concentration ( $p=0.005$ ) or low concentration ( $p=0.002$ ) rewards during the interleaved  
227 portion was significantly increased from lick rate during access to the low concentration reward  
228 in the blocked portion of the task. These changes in lick rate were not accounted for by the  
229 changes in lick counts reported above (Spearman rank correlation: 0.44242,  $p=0.20042$ ) and  
230 suggest that shifting from blocked to interleaved presentations of the two rewards increased the  
231 vigor with which the rats licked for the lower value fluid.

232

### 233 *Blocked-Interleaved Task: MFC rhythmicity tracks response vigor*

234         Having established that the Blocked-Interleaved Task can reveal effects of reward  
235 expectation on task engagement and response vigor, we next examined how neural activity in  
236 the MFC and OFC varies with these behavioral measures. We assessed changes in lick-  
237 entrained ERPs and their amplitudes (Figure 6A,D), ERSP, and ITC (phase-locking) (Figure 6B-  
238 C,E-F). LFPs in MFC and OFC showed strong 4-8 Hz phase-locking during licks for the high

239 concentration rewards in the blocked phase of the task (Figure 6B,E). We performed a two-way  
240 ANOVA on maximum ITC values (Figure 6C,F) from LFPs in both MFC and OFC for each rat  
241 and each electrode channel with interaction terms for lick type (high or low concentration  
242 reward) and portion of the task (blocked or interleaved reward access), and found a significant  
243 interaction of lick type by portion of the task (MFC:  $F(1,572)=10.45$ ,  $p=0.001$ ); OFC:  
244  $F(1,363)=12.119$ ,  $p<0.001$ ). Post-hoc analyses revealed that while there was a significant  
245 difference in phase-locking of licks for high versus low concentration in the blocked portion  
246 (MFC:  $p<0.001$ ; OFC:  $p<0.036$ ), there was no difference in phase-locking of licks for high versus  
247 low concentration rewards in the interleaved portion of the task (MFC:  $p=0.999$ ; OFC:  $p=0.973$ ).  
248 In MFC, a two-way ANOVA revealed a significant interaction of lick type by portion of the task  
249 with ERP peak-to-peak size (Figure 6A) as the dependent variable ( $F(1,564)=6.232$ ,  $p=0.013$ ).  
250 However, there were no differences between the ERP measures between high and low  
251 concentration licks during the blocked portion of the task ( $p=0.887$ ) and between high and low  
252 concentration licks during the interleaved portion of the task ( $p=0.938$ ).

253         The same was true with ERSP measures for MFC LFPs; There was a significant  
254 interaction between lick type and portion of the task ( $F(1,564)=30.17$ ,  $p<0.001$ ; two-way  
255 ANOVA), but no significant difference between ERSP values between high and low  
256 concentration licks in the blocked ( $p=0.213$ ) or interleaved ( $p=0.743$ ) portions of the task. In  
257 OFC (Figure 6D), there was no significant interaction of lick type and portion of the task by the  
258 amplitude size of the lick's ERPs ( $F(1,363)=0.131$ ,  $p=0.718$ ; two-way ANOVA), and no  
259 difference in OFC ERSP values of lick type by portion of the task either ( $F(1,363)=0.744$ ,  
260  $p=0.389$ ; two-way ANOVA).

261         We wanted to further investigate potential differences in MFC and OFC in the Blocked-  
262 Interleaved Task, since initial results show a general increase of ITC values from MFC in the  
263 interleaved portion of the task and a general decrease in ITC values from OFC. This was of

264 particular interest since MFC ITC values varied with the lick rate, which increased for both the  
265 high and low concentration licks in the interleaved portion of the task. We directly compared ITC  
266 values in both regions with lick rate and total lick counts (Figure 7).

267 Post-hoc analyses displayed in Figure 7C revealed that in MFC there was a significant  
268 difference between ITC values for the high versus low concentration licks (as also documented  
269 at the top of Figure 6C), but ITC values for high concentration licks during the blocked portion of  
270 the task did not differ from ITC values for either the high ( $p=0.075$ ) or low concentration  
271 ( $p=0.089$ ) conditions in the interleaved portion of the task. The pattern of post-hoc contrasts  
272 matches the lick-rate data (Figure 7B) for all paired comparisons. This match includes the  
273 finding (Figure 7C) that ITC values for low concentration licks in MFC differed from all three of  
274 the other conditions (high concentration blocked, high concentration interleaved, and low  
275 concentration interleaved licks;  $p<0.001$  for each comparison). The MFC ITC post-hoc test  
276 results (Figure 7C) did not match the pattern for total licks (Figure 7A).

277 In OFC, ITC values (Figure 7D) did not match either the total-lick (Figure 7A) or lick-rate  
278 (Figure 7B) comparisons, despite the qualitative similarity with the total number of licks  
279 (compare Figure 7D with Figure 7A). The only significant difference in ITC values in OFC was  
280 between the high and low concentration licks in the blocked portion of the task (as also  
281 documented at the top of Figure 6F). All other comparisons were non-significant. This pattern of  
282 post-hoc comparisons did not match either total licks (compare Figure 5A with 5D) or lick rate  
283 (compare Figure 7B with 7D).

284 Together with the results summarized in Figure 6, these findings from post-hoc testing in  
285 Figure 7 provide evidence that MFC and OFC encode different aspects of licking and reward  
286 value. There was a clear match between the pattern of lick entrainment in the MFC, but not the  
287 OFC, with the animals' licking rates. The correspondence between lick entrainment in MFC and  
288 the animals' lick rates provides support for the idea that neural activity in MFC is sensitive to

289 response vigor. By contrast, OFC might be involved in more general aspects of motivation, e.g.  
290 to lick or not (reward evaluation) based on reward magnitude or the predictability of the  
291 environment.

292

### 293 *Three Reward Task: Behavioral evidence for effects of relative reward value*

294 The previous experiments assessed comparison of two levels of rewards (either high/low  
295 concentration or large/small volume) in the Shifting Values Licking Task. After finding behavioral  
296 and electrophysiological differences between two rewards, we aimed to investigate how animals  
297 process reward with contexts involving three different rewards. In this experiment, we assessed  
298 if rats process rewards in a relative manner or in an absolute manner by implementing a third  
299 intermediate (8% wt./vol. sucrose concentration) reward.

300 In the Three Reward Task (Figure 8A), the first block consists of the Shifting Values  
301 Licking Task with 30 sec shifts between the intermediate value (8% sucrose) reward and the low  
302 value (4% sucrose) reward. After 3 minutes the second block of the task begins, where rats then  
303 experience shifting values of reward from the high value (16% sucrose) reward to the  
304 intermediate value (8% sucrose) reward. This allowed us to assess how rats would process the  
305 intermediate 8% sucrose reward when it is paired with a worse (4%) or better (16%) option  
306 within one session. Additionally, the design introduces a second context (just like in the  
307 Blocked-Interleaved Task previously) in which we could assess if animals are still processing a  
308 (temporally) local comparison of reward types.

309 Licking varied with both reward value and block, i.e. low vs intermediate and  
310 intermediate vs high ( $F(3,33)=34.2$ ,  $p<0.001$ ) (Figure 8B). Post-hoc analyses revealed that rats  
311 emitted significantly more licks for the intermediate value 8% reward as opposed to the low  
312 value 4% reward in block 1 ( $p<0.001$ ). In block 2, rats also emitted significantly fewer licks for  
313 the intermediate value 8% reward when it was paired with the high value 16% reward ( $p<0.001$ ).

314 Rats also licked significantly less for the intermediate 8% reward in block 2 than they did in  
315 block 1 ( $p < 0.001$ ).

316           There was a more subtle effect for differences in bout duration across the different  
317 rewards ( $F(3,33)=5.333$ ,  $p=0.004$ ; two-way ANOVA) (Figure 8C). Post-hoc analyses revealed  
318 no significant difference in bout duration for the 4% versus 8% in block one ( $p=0.098$ ), yet there  
319 was a significant decrease in bout durations during access to the 8% versus 16% in block two  
320 ( $p=0.023$ ). Bout durations during access to the intermediate 8% reward in block 1 versus block  
321 2 were not different ( $p=0.20$ ). While there was a significant effect of lick type on lick rate  
322 ( $F(3,33)=10.59$ ,  $p < 0.001$ ; two-way ANOVA), post-hoc analyses revealed no major differences in  
323 lick rate of the licks for rewards in block 1 ( $p=0.17$ ) or block 2 ( $p=0.31$ ) (Figure 8D), nor for the  
324 lick rate for 8% licks in block 1 versus block 2 ( $p=0.76$ ).

325

326 *Three Reward Task: Neural activity does not reflect relative reward value encoding*

327           The behavioral measures summarized above established that the Three Reward Task  
328 can reveal effects of relative value comparisons. We next analyzed electrophysiological signals  
329 from MFC and OFC (Figure 9) to determine if they tracked the animals' behavior in the task, and  
330 might encode relative differences in value, or some other aspect of value, such as the absolute  
331 differences between the three rewards. We found a significant difference between ITC values  
332 for the three different rewards in both MFC and OFC (MFC:  $F(3,627)=154.4$ ,  $p < 0.001$ ; OFC:  
333  $F(3,363)=13.29$ ,  $p < 0.001$ ; two-way ANOVAs). Tukey post-hoc analyses revealed a difference in  
334 ITC values between intermediate and low licks in block 1 (MFC:  $p < 0.001$ ; OFC:  $p=0.003$ ), and a  
335 difference in ITCs between high and intermediate licks in block 2 for MFC only (MFC:  $p < 0.005$ ;  
336 OFC:  $p=0.313$ ) (Figure 9B-C,E-F). There was no difference between ITC values from  
337 intermediate (8%) block 1 and intermediate block 2 licks in both regions (MFC:  $p=0.881$ ; OFC:  
338  $p=0.705$ ). There was a significant difference between MFC ITC values for block 1 intermediate

339 (8%) licks and block 2 high (16%) licks ( $p=0.028$ ), as well as a significant difference between  
340 MFC ITC values for block 1 low (4%) licks and block 2 intermediate (8%) licks ( $p<0.001$ ).  
341 Signals from the OFC did not differ across these conditions.

342 Peak to peak amplitude analysis of the Three Reward Task revealed a significant effect  
343 of block on MFC LFP amplitude across lick types ( $F(3,627)=15.56$ ,  $p<0.001$ ; two-way ANOVA)  
344 (Figure 9A). Tukey post-hoc testing revealed no relevant significant differences between ERP  
345 size in MFC (between block 1 intermediate and low licks:  $p=0.864$ ; between block 2 high and  
346 intermediate licks:  $p=0.944$ ). There was no difference in OFC amplitude size ( $F(3,363)=0.827$ ,  
347  $p=0.479$ , two-way ANOVA) (Figure 9D). While there was a significant effect for ERSP values in  
348 both MFC and OFC (MFC:  $F(3,627)=18.35$ ,  $p<0.001$ ; OFC:  $F(3,363)=5.108$ ,  $p=0.002$ ; two-way  
349 ANOVAs), none of the relevant measures were significant (block 1 intermediate and low licks:  
350 MFC:  $p=0.875$ ; OFC:  $p=0.492$ ; block 2 high and intermediate licks: MFC:  $p=0.637$ ; OFC:  
351  $p=0.999$ ).

352 The ITC findings, at least in MFC, support the idea that the “higher value” and “lower  
353 value” rewards in each context are being encoded differently across contexts. They indicate that  
354 MFC might instead encode absolute reward value instead of relative reward value. Qualitatively,  
355 the ITC values in MFC seem to have the same pattern as the lick rate (Figure 10B,C), similar to  
356 how MFC values reflected lick rate in the Blocked-Interleaved Task. However, post-hoc  
357 statistical testing revealed important differences. For example, the ITC in MFC differed  
358 significantly for high- vs. low-value rewards in both blocks 1 and 2, but lick rate did not.  
359 Importantly, post-hoc analyses revealed a significant difference in ITC values in MFC for every  
360 reward combination except for the intermediate block 1 and intermediate block 2 rewards, which  
361 reflects our operational definition for absolute encoding of value (see Figure 10 - figure  
362 supplement 1A-B).



363           The encoding of value was less clear based on ITC measures from the OFC. These  
364 values did not directly match the licking behavior (in either rate, total licks, or bout duration)  
365 (compare Figure 10A,B with 8D), and did not show clear evidence for either absolute or relative  
366 encoding of reward. Instead, the results from Figure 10D indicate that OFC might instead  
367 encode reward value in a mixed absolute/relative manner (as in Figure 10 - figure supplement  
368 1C and Figure 10 - figure supplement 2). However, these findings should be interpreted in the  
369 light of uneven sampling between areas, with fewer recordings done in the OFC. It is therefore  
370 possible that our results are underpowered for the OFC and new experiments could reveal an  
371 alternative interpretation.

372

## 373 DISCUSSION

374           We investigated the role of MFC and OFC in processing reward information as rats  
375 participated in various consummatory licking tasks. Rats process and express changes in  
376 reward size in roughly the same manner as with reward concentration, both behaviorally and  
377 electrophysiologically. LFP activity in both MFC and OFC is sensitive to changes in reward type  
378 (both volume and concentration). Our results reveal context-dependent value signals in both  
379 regions through randomly presented rewards and by introducing a third reward in the task.  
380 Behaviorally, rats show evidence for a relative expression of rewards, while neural activity in  
381 MFC and OFC did not reflect relative encoding of reward. Together, our findings suggest that  
382 rats sample rewards and commit to consuming a given reward when they are able to predict its  
383 value, and this behavior is coupled to neural activity in MFC and OFC that encode both the  
384 value of the reward and the animal's consummatory strategy. The subtle differences between  
385 the two regions follow the hypothesis that these areas provide different roles during  
386 consummatory behavior. We additionally provide evidence for MFC representing action-

387 outcome relationships, as MFC ITC activity is more strongly correlated to the action of licking  
388 and may signal information about the “value of the action.”

389

### 390 *Rhythmic Activity and Reward Processing*

391           Similar to our previous studies (Horst and Laubach, 2013; Amarante et al., 2017), neural  
392 activity was entrained to the lick cycle across all tasks in both MFC and OFC. Entrainment was  
393 strongest for the high-value reward (either of size or sweetness) and varied with the animals  
394 consummatory strategy (persistently lick a highly preferred option or sample fluid and wait for  
395 better option). Previous studies have viewed this rhythmic activity as being driven by the act of  
396 licking, as rats naturally lick at 6-7 Hz (Travers et al, 1997; Weijnen, 1998; Host and Laubach,  
397 2013). However, the activity cannot be explained solely by licking, as there are instances where  
398 phase-locking and behavior do not show the same pattern (e.g. the Blocked-Interleaved  
399 experiment), and the variety of studies reported here and in Amarante et al. (2017) suggest a  
400 higher order role for rhythmic activity in the control of consummatory behavior.

401           Indeed, a major question for our study might be the extent to which lick-entrained  
402 oscillations in MFC and OFC can be dissociated from the act of licking. We adapted methods for  
403 spike-field coherence to examine this question (Figure 2). We found that the coherence  
404 between licks and rhythmic LFP signals in the licking frequency range was no larger than 0.5  
405 (with lick-field coherence ranging between 0 and 1), was stronger for the MFC recordings  
406 compared to the OFC recordings and varied with the reward value of the consumed fluid. These  
407 findings suggest that the LFP oscillations are not simply driven by licking.

408           Furthermore, using directed coherence to examine directional influences of recordings in  
409 the two cortical areas, we found evidence for a weak directionality at the licking frequency such  
410 that the phase of the signals in MFC lead those in OFC. This result was especially apparent for  
411 the most rostral recording sites in the MFC, located in the medial orbital area and the adjacent

412 frontal agranular area. Notably, these recording sites are immediately adjacent to a region of the  
413 frontal cortex where oral movements can be generated by electrical stimulation at low current  
414 (Yoshida et al., 2009). As such, the field recordings in the rostral part of the MFC might reflect  
415 activity from the adjacent oral motor cortex or could be locally generated. Resolving this matter  
416 will require new experiments, likely using optogenetic stimulation to avoid stimulation of fibers of  
417 passage.

418         We propose a functional interpretation of these signals based on findings on “medial  
419 frontal theta” (Cavanagh and Frank, 2014) in other types of behavioral tasks. There have been  
420 several proposals for the role of frontal theta in information processing. One idea is that the  
421 rhythm acts to break up sensory information into temporal chunks (Uchida and Mainen, 2003),  
422 and is related to the notion of a global oscillatory signal to synchronize neural activity across  
423 multiple brain structures throughout the taste-reward circuit (Gutierrez and Simon, 2013).  
424 Another idea is that frontal theta acts as an action monitoring signal (Cavanagh et al, 2012;  
425 Narayanan et al., 2013; Laubach et al., 2015), which can be generated through simple recurrent  
426 spiking network models (Bekolay et al., 2014). Finally, instead representing a specific function,  
427 frontal theta may act as a convenient “language” for distant brain regions to exchange  
428 information with each other (Womelsdorf et al., 2010). Our general findings contribute to this  
429 literature by suggesting that frontal theta acts as a value signal to guide consummatory  
430 behavior, which is the ultimate consequence of many goal-directed actions in natural  
431 environments.

432

### 433 *A Common Code for Reward Magnitude*

434         A major finding in the present study (Figures 3 and 4) was the similar  
435 electrophysiological signals in MFC and OFC are associated with the consumption of high and  
436 low concentration liquid sucrose rewards and large and small volume rewards. Although other

437 studies have found either decreases (Kaplan et al., 2001) or increases in behavior with  
438 increases in concentration and volume rewards in the same study (Hulse et al., 1960; Collier  
439 and Myers, 1961; Collier and Wills, 1961), these studies did not investigate the  
440 electrophysiological correlates of consuming rewards. Our study is the first to show a  
441 generalized “value signal” in the frontal cortex that scales with increased size and increased  
442 concentration of liquid sucrose. These signals might underlie the computation of a common  
443 currency (Montague and Berns, 2005; Levy and Glimcher, 2011; Levy and Glimcher, 2012;  
444 Strait et al., 2014) for the amount of nutrient available in a given food item and contribute to  
445 value-guided control of consumption.

446

#### 447 *Evidence for the Contextual Control of Consumption*

448         In the Blocked-Interleaved Task (Figure 5A), rats who licked more, longer, and faster for  
449 the high concentration reward when rewards were blocked did not continue to do so during  
450 interleaved portion of the task (Figure 5B-C). Instead, they licked nearly equally for the high and  
451 low concentration solutions, a result that is suggestive of the loss of positive contrast effects for  
452 the higher value fluid that is commonly found in the blocked design (Parent et al., 2015a).  
453 Despite these differences in behavior, the rats’ LFPs in MFC and OFC showed high levels of  
454 lick-entrained activity, essentially equal to that found during consumption of the higher value  
455 fluid in the blocked part of the session.

456         This finding is hard to reconcile with enhanced lick entrainment reflecting reward  
457 contrast effects. If positive contrast engenders entrainment, then LFPs should have shown  
458 reduced phase locking to the lick cycle in the interleaved portion of the task. Instead, the results  
459 might suggest that LFPs in MFC and OFC are entrained to licking when rats engage in  
460 persistent licking, as was found in the periods with high concentration access in the blocked part  
461 of the sessions and across the entire interleaved part of the session, and entrainment is

462 reduced when rats switch to sampling the fluid during periods with low value access in the  
463 blocked part of the session. By this view, LFP entrainment to the lick cycle could serve as a  
464 contextual marker for reward state and the behavioral strategy deployed by the rat to sample  
465 and wait or persistently consume the liquid sucrose. This contextual information would depend  
466 on knowledge of the temporal structure of the reward deliveries. That is, when reward values  
467 are blocked, the rats have learned to expect alternative access to higher and lower reward  
468 values over extended periods of time (30 sec). By contrast, when reward values are interleaved,  
469 the changes in values occur rapidly and are unpredictable. The reduction in lick entrainment  
470 might therefore reflect the animal's sampling strategy.

471 Contextual coding of reward value was also apparent in the Three Reward Task (Figures  
472 8-10), where lick entrainment was stronger when the higher value option was available (Figure  
473 9). In this case, the strength of engagement, for MFC but not OFC, tracked reward value in  
474 manner suggestive of an absolute reward encoding, with entrainment being higher for the 16%  
475 sucrose solution compared to the 8% solution when both were the "best" option (Figure 10C,D).  
476 These electrophysiological results were notably distinct from behavioral measures such as total  
477 licking output and lick rate (Figure 10A,B), which provided evidence for relative value  
478 comparisons.

479 Our electrophysiological results support theories of absolute reward value (Hull, 1943;  
480 Spence, 1956; Flaherty, 1982), as opposed to theories of relative reward value (Crespi, 1942;  
481 Black, 1968; Webber et al., 2015). Our findings might also fit with the neuro-economics idea of  
482 menu invariance versus menu-dependent goods (Padoa-Schioppa, 2011), both of which have  
483 been supported by electrophysiological studies on OFC (Padoa-Schioppa and Assad, 2006;  
484 Padoa-Schioppa and Assad, 2008; Tremblay and Schultz, 1999; Saez et al., 2017).  
485 Notably, in several instances we found a mismatch of behavioral output and corresponding  
486 magnitude of neural activity. This was evident in the Blocked-Interleaved task, where MFC and

487 OFC ITCs did not reflect total licks emitted, as well as in the Three Reward Task where MFC  
488 and OFC ITCs did not reflect total licks or lick rate. This is in opposition to the Shifting Values  
489 Licking Task, where MFC and OFC activity directly matched behavioral output of licks, lick rate,  
490 and bout duration. These findings reveal the importance of recording careful behavioral output  
491 with electrophysiological recordings, and it remains an open discussion on the mechanisms  
492 behind correlative behavior versus diverging behavioral output from neural activity.

493

#### 494 *Functional interpretations of phase entrainment*

495 The original observation that suggested phase locking of licks to MFC field potentials  
496 was reported in Horst and Laubach (2013). Peri-event plots of LFPs around the times of licks  
497 revealed Event-Related Potentials (ERPs). The nature of ERPs has been researched  
498 extensively in the EEG literature. A leading view is that ERPs arise from a synchronization of  
499 the phase of an ongoing rhythm and/or from the superposition of inputs to the region of cortex  
500 near the electrode (e.g., Klimesch et al., 2007; Suaseng et al., 2007). Evidence for phase  
501 locking near the licking frequency can be found in Figures 1 and 3 in Amarante et al. (2017),  
502 with some exceptions being at slightly higher frequencies, e.g., Figure 8E in that study. By  
503 contrast, LFP power is typically tonic in the range of delta (<4 Hz) and the animals' licking  
504 frequency mostly showed only minor changes in power (Figures 1 and 3 in Amarante et al.,  
505 2017). Furthermore, in another experiment with periodic reinforcement, we reported that phase  
506 but not power varied reinforcement (Figure 7, Amarante et al., 2017). These findings suggest  
507 that phase, not power, has a relationship with reinforced licking behavior, and the same  
508 determinants for phase locking likely apply to the results reported here.

509 Our data suggest that the act of licking synchronizes the phase of ongoing rhythms in  
510 the MFC and OFC and that this synchronization occurs during periods of sustained increases in  
511 delta band power. Computational models of LFP rhythmicity suggest that information flow is

512 controlled by the interplay between different functional rhythms, with activity at higher  
513 frequencies nested within the periods of lower frequencies (Kopell et al., 2010). Brain slice  
514 (Carracedo et al., 2013) suggest that theta-range rhythmicity may be nested within cycles of the  
515 lower frequency delta rhythm. For our studies, as shown in Figure 3 from Amarante et al.  
516 (2017), the duration of elevated phase synchronization was roughly twice as long as the median  
517 inter-lick interval, and the inverse of this interval would indicate a frequency of ~3.5 Hz, i.e.,  
518 delta. The same mechanisms are likely to apply to the present study. A possible source for the  
519 delta rhythm is the animal's respiratory cycle (Lockmann and Tort, 2018), which must be  
520 regulated during periods of sustained licking when high value fluid is available.

521 Our finding of zero-lag correlation across frequencies (Figure 2D) further suggests that a  
522 source of common variance to MFC and OFC modulates the timing of processing, and leads to  
523 a slight advance in the phase angles of the rhythm in MFC relative to OFC (directed coherence  
524 in Figure 2E-H). The strength of this input would seem to vary between areas, being stronger in  
525 MFC compared to OFC and strongest in the rostral MFC (medial orbital cortex) overall (Figure  
526 2H). These patterns of directional influences presumably vary with the extent of lick-field  
527 coherence and thereby with the value of the consumed fluid.

528 It is not clear from our studies if the reduction in entrainment when low value rewards are  
529 available is an active or passive process. For example, it is possible that some active input to  
530 the MFC and OFC denotes the temporal context (e.g. dopamine, hippocampus), enhancing  
531 entrainment when the higher value option is available. Alternatively, signals from sensorimotor  
532 regions of the frontal cortex, which sit in between the MFC and OFC, the oral sensory and motor  
533 cortices (Yoshida et al., 2009), might be reduced during periods with less intense licking,  
534 leading to a passive reduction in overall frontal lick entrainment. Future studies are needed to  
535 address these neural mechanisms of licking-related synchrony in the rodent frontal cortex.

536

537 *Differences in reward signaling between MFC and OFC*

538           The electrophysiological results from the Blocked-Interleaved Task and Three Reward  
539 Task suggest that MFC and OFC, while showing similar results overall, may be contributing to  
540 processing reward information in different ways. It is important to note that due to a smaller  
541 sample size of OFC recordings, the less clear findings in OFC may indeed require further future  
542 experiments. However, our findings do follow previous work on subtle differences of these  
543 areas. In accord with a previous theory on proposed MFC and OFC functions (Balleine and  
544 Dickinson, 1998, Balleine and Dickinson, 2000; Schoenbaum et al., 2009; Sul et al., 2011;  
545 Passingham and Wise, 2012), MFC activity may be acting to maintain and optimize licking  
546 behavior in an action-centric manner, as reflected in measures such as the licking rate, a  
547 measure associated with vigor and sensitive to inactivation of the same cortical area in a  
548 progressive ratio licking task (Swanson et al., 2019). By contrast, OFC activity generally  
549 reflected differences in reward value, perhaps due to the different sensory properties of the  
550 fluids (Gutierrez et al., 2006), and was not sensitive to licking rate (vigor) or task engagement  
551 (total licks).

552

553 **METHODS**

554           All procedures carried out in this set of experiments were approved by the Animal Care  
555 and Use Committee at American University (Washington, DC). Procedures conformed to the  
556 standards of the National Institutes of Health Guide for the Care and Use of Laboratory Animals.  
557 All efforts were taken to minimize the number of animals used and to reduce pain and suffering.

558

559 *Animals*

560           Male Long Evans and Sprague Dawley rats weighing between 300 and 325 g were used  
561 in these studies (Charles River, Envigo). As relatively few animals were used, we did not



| <b>Key Resources Table (animals and any item with an RRID)</b> |                                     |                                                                                                       |                           |                               |
|----------------------------------------------------------------|-------------------------------------|-------------------------------------------------------------------------------------------------------|---------------------------|-------------------------------|
| <b>Reagent type (species) or resource</b>                      | <b>Designation</b>                  | <b>Source or reference</b>                                                                            | <b>Identifiers (RRID)</b> | <b>Additional information</b> |
| Strain, strain background ( <i>Rattus norvegicus</i> )         | Sprague-Dawley, Long-Evans          | Charles River, Envigo                                                                                 | NA                        | Rat (male)                    |
| Instrument                                                     | Precision Syringe Pump Controller   | <a href="https://doi.org/10.1523/ENEURO.0240-19.2019">https://doi.org/10.1523/ENEURO.0240-19.2019</a> | SCR_021493                |                               |
| Software, Algorithm                                            | Med-PC                              | MedAssociates                                                                                         | SCR_012156                |                               |
| Software, Algorithm                                            | GNU Octave                          | <a href="https://www.gnu.org/software/octave/">https://www.gnu.org/software/octave/</a>               | SCR_014398                |                               |
| Software, Algorithm                                            | R Project for Statistical Computing | <a href="https://www.r-project.org/">https://www.r-project.org/</a>                                   | SCR_001905                |                               |
| Software, Algorithm                                            | NeuroExplorer                       | <a href="https://www.neuroexplorer.com/">https://www.neuroexplorer.com/</a>                           | SCR_001818                |                               |
| Software, Algorithm                                            | Matplotlib                          | <a href="https://matplotlib.org/">https://matplotlib.org/</a>                                         | SCR_008624                |                               |
| Software, Algorithm                                            | IPython                             | <a href="https://ipython.org/">https://ipython.org/</a>                                               | SCR_001658                |                               |
| Software, Algorithm                                            | Jupyter                             | <a href="https://jupyter.org/">https://jupyter.org/</a>                                               | SCR_018416                |                               |
| Software, Algorithm                                            | Seaborn                             | <a href="https://seaborn.pydata.org/">https://seaborn.pydata.org/</a>                                 | SCR_018132                |                               |

|                     |        |                                                                                             |            |  |
|---------------------|--------|---------------------------------------------------------------------------------------------|------------|--|
| Software, Algorithm | MATLAB | Mathworks                                                                                   | SCR_001622 |  |
| Software, Algorithm | EEGLab | <a href="https://sccn.ucsd.edu/eeglab/index.php">https://sccn.ucsd.edu/eeglab/index.php</a> | SCR_007292 |  |

562

563 investigate sex differences in reward processing in this study. Sex differences among rats are  
564 well known for how liquid sucrose is consumed (e.g. Sclafani et al., 1987) and classic studies of  
565 incentive contrast (e.g. Flaherty & Rowan, 1986), which led to the design of the behavioral  
566 procedures used here, were mostly carried out using male rats. As such, we cannot comment  
567 on sex differences or how reward value is encoded in the frontal cortex of female rats. These  
568 important topics require further study.

569 Rats were given one week to acclimate with daily handling prior to behavioral training  
570 and surgery and were then kept with regulated access to food to maintain 90% of their free-  
571 feeding body weight. They were given ~18 g of standard rat chow each day in the evenings  
572 following experiments. Rats were single housed in their home cages in a 12h light/dark cycle  
573 colony room, with experiments occurring during the light cycle. A total of 12 rats had a 2x8  
574 microwire array implanted into either the MFC (N=6), the OFC (N=2) or one array in each area  
575 contralaterally (N=4). Arrays consisted of 16 blunt-cut 50- $\mu$ m tungsten (Tucker-Davis  
576 Technologies) or stainless steel (Microprobes) wires, separated by 250  $\mu$ m within each row and  
577 500  $\mu$ m between rows. In vitro impedances for the microwires were ~150 k $\Omega$ .

578

### 579 *Surgeries*

580 Animals had full access to food and water in the days prior to surgery. Stereotaxic  
581 surgery was performed using standard methods. Briefly, animals were lightly anesthetized with

582 isoflurane (2.5% for ~2 minutes), and were then injected intraperitoneally with ketamine  
583 (100mg/kg) and dexdomitor (0.25mg/kg) to maintain a surgical plane of anesthesia. The skull  
584 was exposed, and craniotomies were made above the implant locations. Microwire arrays were  
585 lowered into MFC (coordinates from bregma (AP: +3.2 mm; ML: + 1.0 mm; DV: -1.2 mm from  
586 the surface of the brain, at a 12° posterior angle; Paxinos and Watson, 2013) or into OFC (AP:  
587 +3.2 mm, ML: + 4.0 mm, DV: -4.0 mm; Paxinos and Watson, 2013). The part of the MFC  
588 studied here is also called “medial prefrontal cortex” in many rodent studies and the region is  
589 thought to be homologous to the rostral ACC of primates (Laubach et al., 2018). Four skull  
590 screws were placed along the edges of the skull and a ground wire was secured in the  
591 intracranial space above the posterior cerebral cortex. Electrode arrays were connected to a  
592 headstage cable and modified Plexon preamplifier during surgery, and recordings were made to  
593 assess neural activity during array placement. Craniotomies were sealed using cyanoacrylate  
594 (Slo-Zap) and an accelerator (Zip Kicker), and methyl methacrylate dental cement (AM  
595 Systems) was applied and affixed to the skull via the skull screws. Animals were given a  
596 reversal agent for dexdomitor (Antisedan, s.c. 0.25 mg/ml), and Carprofen (5 mg/kg, s.c.) was  
597 administered for postoperative analgesia. Animals recovered from surgery in their home cages  
598 for at least one week with full food and water, and were weighed and monitored daily for one  
599 week after surgery.

600

### 601 *Behavioral Apparatus*

602 Rats were trained in operant chambers housed within a sound-attenuating external  
603 chamber (Med Associates; St. Albans, VT). Operant chambers contained a custom-made glass  
604 drinking spout that was connected to multiple fluid lines allowing for multiple fluids to be  
605 consumed at the same location. The spout was centered on one side of the operant chamber  
606 wall at a height of 6.5 cm from the chamber floor. Tygon tubing connected to the back of the

607 drinking spout administered the fluid from a 60-cc syringe hooked up to either a PHM-100 pump  
608 (Med Associates) for standard experiments, or to a customized open-source syringe pump  
609 controller (Amarante et al., 2019) that is programmed by a teensy microcontroller to deliver  
610 different volumes of fluid with the same delivery time from one central syringe pump. A “light-  
611 pipe” lickometer (Med Associates) detected licks via an LED photobeam, and each lick triggered  
612 the pump to deliver roughly 30  $\mu$ L per 0.5 second. Behavioral protocols were run though Med-  
613 PC version IV (Med Associates), and behavioral data was sent via TTL pulses from the Med-PC  
614 software to the Plexon recording system.

615

#### 616 *Shifting Values Licking Task*

617 The operant licking task used here is similar to those previously described (Parent et al.,  
618 2015a,b; Amarante et al., 2017). Briefly, rats were placed in the operant chamber for thirty  
619 minutes, where they were solely required to lick at the drinking spout to obtain a liquid sucrose  
620 reward. Licks to the light-pipe lickometer would trigger the syringe pump to deliver liquid sucrose  
621 over 0.5 sec. In other words, the first lick to the spout triggers the pump and reward is then  
622 delivered for 0.5 sec, where any lick within that 0.5 sec window would also be rewarded. The  
623 next lick after 0.5 sec would subsequently trigger the pump to turn on again for 0.5 sec. Every  
624 30 sec, the reward alternated between high (16% weight per volume) and low (4% wt./vol.)  
625 concentrations of liquid sucrose, delivered in a volume of 30  $\mu$ L. In volume manipulation  
626 sessions, the reward alternated between a large (27.85  $\mu$ L) and small volume (9.28  $\mu$ L) of 16%  
627 liquid sucrose. Rewards were delivered over a period of 0.5 sec for all levels of concentration  
628 and volume using a custom-made syringe pump (Amarante et al., 2019). The animal’s licking  
629 behavior was constantly recorded throughout the test sessions.

630

631

632 *Blocked versus Randomly Interleaved Licking Task*

633           The Shifting Values Licking Task was altered to allow for comparison of blocked versus  
634 interleaved presentations of reward values. The first three minutes of the task consisted of the  
635 standard Shifting Values Licking Task, with 30 second blocks of either the high or low  
636 concentration sucrose rewards delivered exclusively during the block. After three minutes, the  
637 rewards were presented in a pseudo-random order (e.g., high, high, low, high, low, low, high) for  
638 the rest of the test session. With rewards interleaved, rats were unaware of which reward would  
639 be delivered next. Behavioral and neural data were only analyzed from the first six minutes of  
640 each test session. We focused on manipulating sucrose concentration, and not fluid volume, in  
641 this task variation, as concentration differences provided the most effects of reward value on  
642 licking behavior (see Figure 1D).

643

644 *Three Reward Licking Task*

645           The Shifting Values Licking Task was modified, using a third intermediate concentration  
646 of sucrose (8% wt./vol) to assess if reward value influenced behavior and neuronal activity in a  
647 relative or absolute manner. In the first three minutes of each session, rats received either the  
648 intermediate (8%) or low (4%) concentration of sucrose, with the two rewards delivered over  
649 alternating 30 second periods as in the SVLT. After three minutes, the rewards switched to the  
650 high (16%) and intermediate (8%) concentrations, and alternated between those concentrations  
651 for the rest of the session. Behavioral and neural data were only analyzed from the first six  
652 minutes of each test session.

653

654 *Electrophysiological Recordings*

655           Electrophysiological recordings were made using a Plexon Multichannel Acquisition  
656 Processor (MAP; Plexon; Dallas, TX). Local field potentials were sampled on all electrodes and

657 recorded continuously throughout the behavioral testing sessions using the Plexon system via  
658 National Instruments A/D card (PCI-DIO-32HS). The sampling rate was 1 kHz. The head-stage  
659 filters (Plexon) were at 0.5 Hz and 5.9 kHz. Electrodes with unstable signals or prominent peaks  
660 at 60 Hz in plots of power spectral density were excluded from quantitative analysis.

661

### 662 *Histology*

663 After all experiments were completed, rats were deeply anesthetized via an  
664 intraperitoneal injection of Euthazol (100mg/kg) and then transcardially perfused using 4%  
665 paraformaldehyde in phosphate-buffered saline. Brains were cryoprotected with a 20% sucrose  
666 and 10% glycerol mixture and then sectioned horizontally on a freezing microtome. The slices  
667 were mounted on gelatin-subbed slides and stained for Nissl substance with thionin.

668

### 669 *Data Analysis: Software and Statistics*

670 All data were analyzed using GNU Octave (<https://www.gnu.org/software/octave/>),  
671 Python (Anaconda distribution: <https://www.continuum.io/>), and R (<https://www.r-project.org/>).  
672 Analyses were run as Jupyter notebooks (<http://jupyter.org/>). Computer code used in this study  
673 is available upon request from the corresponding author.

674 Statistical testing was performed in R. Paired t-tests were used throughout the study and  
675 one or two-way ANOVA (with the error term due to subject) were used to compare data for both  
676 behavior and electrophysiological measures (maximum power and maximum inter-trial phase  
677 coherence) for high and low value licks, blocked versus interleaved licks, and high-intermediate-  
678 low licks. For significant ANOVAs, the error term was removed and Tukey's post-hoc tests were  
679 performed on significant interaction terms for multiple comparisons. Descriptive statistics are  
680 reported as mean  $\pm$  SEM, unless noted otherwise.

681

682 *Data Analysis: Behavior*

683 All rats were first run for at least five standard sessions in the standard Shifting Values  
684 Licking Task with differences in concentration (16% and 4% wt./vol.). Rats have been shown to  
685 acquire incentive contrast effects in the SVLT after this duration of training (Parent et al.,  
686 2015a). For the Blocked-Interleaved and Three Reward tasks, rats were tested after extensive  
687 experience in the SVLT and after two “training” sessions with the Blocked-Interleaved and Three  
688 Reward designs. The electrophysiological recordings reported here were from the animals’ third  
689 session in each task.

690 Behavioral measures included total licks across the session, the duration and number of  
691 licking bouts, and the median inter-lick intervals (inverse of licking frequency). Bouts of licks  
692 were defined as having at least 3 licks within 300 ms and with an inter-bout interval of 0.5 sec or  
693 longer. Bouts were not analyzed in the Blocked-Interleaved Task; due to the unique structure of  
694 the task, bouts were all shortened by default due to a constantly changing reward in the  
695 interleaved phase of the task. While bouts of licks were reported in most tasks,  
696 electrophysiological correlates around bouts were not analyzed because there were often too  
697 few bouts (specifically for the low-lick conditions) in each session to deduce any  
698 electrophysiological effects of reward value on bout-related activity.

699 For analyzing lick rate, inter-lick intervals during the different types of rewards were  
700 obtained, and then the inverse of the median inter-lick interval provided the average lick rate in  
701 Hertz. Any inter-lick interval greater than 1 sec or less than 0.09 sec was excluded from the  
702 analysis. For licks during the randomly interleaved portion of the Blocked-Interleaved Task,  
703 more than two licks in a row were needed to calculate lick rate. To analyze behavioral variability  
704 of licks, we used coefficient of variation (ratio of the standard deviation to the mean) on high and  
705 low value inter-lick intervals that occurred within bouts.

706 In some experiments, imbalances were apparent in measures of total licks and lick rate.  
707 This was due in part to our only calculating inter-lick intervals that were less than 1 second and  
708 consisted of runs of at least 2 consecutive licks. As a result, some licks that were detected were  
709 not included in the quantitative measures of lick rate (e.g. two licks that occur 15 seconds apart  
710 from each other). Isolated licks occur in the behavioral design used in our studies when rats  
711 sample fluid from the spout during periods when low value fluid is available and then do not  
712 engage in persistent licking.

713 Total licks and lick rate are therefore distinct measures and will not always be coupled,  
714 especially because licks occur in bursts. Rats strongly engage when the higher value fluid is  
715 available in the blocked condition and alternatively will lick more sporadically and will default to  
716 sampling the fluid and not maintain engagement when the low value fluid is available. However,  
717 the rate of the licks, in said bouts or bursts, was higher overall during the interleaved parts of the  
718 tests sessions. Why this happened is not clear, but one interpretation is that rats are not  
719 suppressing or sampling the options anymore in the interleaved portion but are instead  
720 maintaining engagement in the task during the interleaved portion of the task when reward  
721 identity is unpredictable.

722

### 723 *Data Analysis: Local Field Potentials*

724 Electrophysiological data were first analyzed in NeuroExplorer  
725 (<http://www.neuroexplorer.com/>), to check for artifacts and spectral integrity. Subsequent  
726 processing was done using signal processing routines in GNU Octave. Analysis of Local Field  
727 Potentials (LFP) used functions from the EEGLab toolbox (Delorme and Makeig, 2004) (Event-  
728 Related Spectral Power and Inter-Trial Phase Coherence) and the signal processing toolbox in  
729 GNU Octave (the peak2peak function was used to measure event-related amplitude). Circular  
730 statistics were calculated using the circular library for R. Graphical plots of data were made



731 using the matplotlib and seaborn library for Python. Analyses were typically conducted in  
732 Jupyter notebooks, and interactions between Python, R, and Octave were implemented using  
733 the rpy2 and oct2py libraries for Python.

734 To measure the amplitude and phase of LFP in the frequency range of licking, LFPs  
735 were bandpass-filtered using eeglab's eegfilt function, with a fir1 filter (Widmann and Schröger,  
736 2012), centered at the rat's licking frequency (licking frequency + inter-quartile range; typically  
737 around 4 to 9 Hz), and were subsequently z-scored.

738 Lick-Field Coherence (LFC) used routines (e.g. sp2a\_m) from the Neurospec 2.0 library  
739 (<http://www.neurospec.org/>) for Matlab and GNU Octave. LFPs were low-pass filtered (100 Hz)  
740 using eegfilt.m from EEGLab. Directed Coherence also used routines (e.g. sp2a2\_R2.m) from  
741 Neurospec 2.0. LFPs were low-pass filtered (100 Hz) using eegfilt.m from EEGLab. The  
742 following parameters were used for LFC and Directed Coherence: Segment power = 10 (1024  
743 points, frequency resolution: 0.977 Hz), Hanning filtering with 50% tapering, and line noise  
744 removal for the LFPs at 60 Hz. Analyses focused on frequencies below 30 Hz based  
745 assessments of power spectra computed by the Neurospec library as part of this analysis.  
746 For inter-trial phase coherence (ITC) and event-related spectral power (ERSP), LFP data was  
747 preprocessed using eeglab's eegfilt function with a fir1 filter and was bandpass filtered from 0 to  
748 100 Hz. For group summaries, ITC and ERSP matrices were z-scored for that given rat after  
749 bandpass filtering the data. Peri-lick matrices were then formed by using a pre/post window of 2  
750 seconds on each side, and the newtimef function from the eeglab toolbox was used to generate  
751 the time-frequency matrices for ITC and ERSP up to 30 Hz.

752 Since most of the lick counts from the Shifting Values Licking Task are generally  
753 imbalanced (with a greater number of licks for high versus low value rewards), we used  
754 permutation testing to perform analyses on amplitude and phase-locking in these studies. Licks  
755 were typically downsampled to match the lower number of licks. 80% of the number of lower

756 value licks were randomly chosen from each session. For example, if a rat emitted 400 licks for  
757 the high concentration sucrose and 200 licks for the low concentration sucrose, then 160 licks  
758 would be randomly chosen from each of data type to compare the same number of licks for  
759 each lick type. This permutation of taking 80% of the licks was re-sampled 25 times and spectral  
760 values were recalculated for each permutation. The maximum ITC value was obtained through  
761 calculating the absolute value of ITC values between 2 to 12 Hz within a ~150 ms window (+1  
762 inter-lick interval) around each lick. The maximum ERSP value was also taken around the same  
763 frequency and time window. Then, the average maximum ITC or ERSP value (of the 25x  
764 resampled values) for each LFP channel for each rat was saved in a data frame, and each  
765 electrode's maximum ITC and ERSP value for each type of lick (high-value or low-value lick)  
766 were used in the ANOVAs for group summaries. Group summary for the peak-to-peak Event-  
767 Related Potential (ERP) size recorded the average difference between the maximum and  
768 minimum ERP amplitude across all frequencies, using + 1 inter-lick interval window around  
769 each lick. The mean ERP size for each electrode for each rat was used in the ANOVAs for  
770 group summaries. These analyses were performed for all behavioral variations.

771 REFERENCES

- 772 Alexander, W. H., & Brown, J. W. (2011). Medial prefrontal cortex as an action-outcome  
773 predictor. *Nature Neuroscience*, 14(10), 1338–1344. <https://doi.org/10.1038/nn.2921>
- 774 Amarante, L. M., Caetano, M. S., & Laubach, M. (2017). Medial frontal theta is entrained to  
775 rewarded actions. *Journal of Neuroscience*, 37(44), 10757–10769.  
776 <https://doi.org/10.1523/JNeurosci.1965-17.2017>
- 777 Amarante, L. M., Newport, J., Mitchell, M., Wilson, J., & Laubach, M. (2019). An open source  
778 syringe pump controller for fluid delivery of multiple volumes. *eNeuro*,  
779 6(5).<https://doi.org/10.1523/eNeuro.0240-19.2019>
- 780 Balleine, B. W., & Dickinson, A. (1998). Goal-directed instrumental action: Contingency and  
781 incentive learning and their cortical substrates. *Neuropharmacology*, 37(4–5), 407–419.  
782 [https://doi.org/10.1016/S0028-3908\(98\)00033-1](https://doi.org/10.1016/S0028-3908(98)00033-1)
- 783 Balleine, B. W., & Dickinson, A. (2000). The effect of lesions of the insular cortex on  
784 instrumental conditioning: evidence for a role in incentive memory. *Journal of*  
785 *Neuroscience*, 20(23), 8954–8964. <https://doi.org/10.1523/JNeurosci.20-23-08954.2000>
- 786 Barreiros, I.V., Panayi, M.C., and Walton, M.E. (2020) Organisation of afferents along the  
787 anterior-posterior and medial-lateral axes of the rat OFC. bioRxiv.  
788 <https://doi.org/10.1101/2020.08.28.272591>
- 789 Bekolay, T., Laubach, M., & Eliasmith, C. (2014). A spiking neural integrator model of the  
790 adaptive control of action by the medial prefrontal cortex. *Journal of Neuroscience*,  
791 34(5), 1892–1902. <https://doi.org/10.1523/JNEUROSCI.2421-13.2014>
- 792 Black, R. W. (1968). Shifts in magnitude of reward and contrast effects in instrumental and  
793 selective learning: A reinterpretation. *Psychological Review*, 75(2), 114–126.  
794 <https://doi.org/10.1037/h0025563>
- 795 Carracedo, L. M., Kjeldsen, H., Cunnington, L., Jenkins, A., Schofield, I., Cunningham, M. O.,  
796 Davies, C. H., Traub, R. D., & Whittington, M. A. (2013). A neocortical delta rhythm  
797 facilitates reciprocal interlaminar interactions via nested theta rhythms. *The Journal of*  
798 *neuroscience : the official journal of the Society for Neuroscience*, 33(26), 10750–10761.  
799 <https://doi.org/10.1523/JNEUROSCI.0735-13.2013>
- 800 Cavanagh, J. F., Zambrano-Vazquez, L., & Allen, J. J. B. (2012). Theta lingua franca: A  
801 common mid-frontal substrate for action monitoring processes: Omnipresent theta.  
802 *Psychophysiology*, 49(2), 220–238. <https://doi.org/10.1111/j.1469-8986.2011.01293.x>
- 803 Cavanagh, J. F., & Frank, M. J. (2014). Frontal theta as a mechanism for cognitive control.  
804 *Trends in cognitive sciences*, 18(8), 414–421. <https://doi.org/10.1016/j.tics.2014.04.012>
- 805 Collier, G., & Myers, L. (1961). The loci of reinforcement. *Journal of Experimental Psychology*,  
806 61(1), 57–66. <https://doi.org/10.1037/h0048851>
- 807 Collier, G., & Willis, F. N. (1961). Deprivation and reinforcement. *Journal of Experimental*  
808 *Psychology*, 62(4), 377–384. <https://doi.org/10.1037/h0047144>
- 809 Crespi, L. P. (1942). Quantitative variation of incentive and performance in the white rat. *The*  
810 *American Journal of Psychology*, 55(4), 467. <https://doi.org/10.2307/1417120>

- 811 Delorme, A., & Makeig, S. (2004). EEGLAB: An open source toolbox for analysis of single-trial  
812 EEG dynamics including independent component analysis. *Journal of Neuroscience*  
813 *Methods*, 134(1), 9–21. <https://doi.org/10.1016/j.jneumeth.2003.10.009>
- 814 Flaherty, C. F. (1982). Incentive contrast: A review of behavioral changes following shifts in  
815 reward. *Animal Learning and Behavior*, 10(4), 409–440.  
816 <https://doi.org/10.3758/BF03212282>
- 817 Flaherty, C. F., & Rowan, G. A. (1986). Successive, simultaneous, and anticipatory contrast in  
818 the consumption of saccharin solutions. *Journal of experimental psychology. Animal*  
819 *behavior processes*, 12(4), 381–393.
- 820 Gabbott, P. L. A., Warner, T. A., Jays, P. R. L., & Bacon, S. J. (2003). Areal and synaptic  
821 interconnectivity of prelimbic (area 32), infralimbic (area 25) and insular cortices in the  
822 rat. *Brain Research*, 993(1–2), 59–71. <https://doi.org/10.1016/j.brainres.2003.08.056>
- 823 Gabbott, P. L. A., Warner, T. A., Jays, P. R. L., Salway, P., & Busby, S. J. (2005). Prefrontal  
824 cortex in the rat: Projections to subcortical autonomic, motor, and limbic centers. *Journal*  
825 *of Comparative Neurology*, 492(2), 145–177. <https://doi.org/10.1002/cne.20738>
- 826 Gallagher, M., McMahan, R. W., & Schoenbaum, G. (1999). Orbitofrontal cortex and  
827 representation of incentive value in associative learning. *Journal of Neuroscience*,  
828 19(15), 6610–6614. <https://doi.org/10.1523/JNeurosci.19-15-06610.1999>
- 829 Gutierrez, R., Carmena, J. M., Nicolelis, M. A. L., & Simon, S. A. (2006). Orbitofrontal ensemble  
830 activity monitors licking and distinguishes among natural rewards. *Journal of*  
831 *Neurophysiology*, 95(1), 119–133. <https://doi.org/10.1152/jn.00467.2005>
- 832 Gutierrez, R., & Simon, S. (2013). Increases in spike timing precision improves gustatory  
833 discrimination upon learning. In P. Di Lorenzo & J. Victor, *Spike Timing* (Vol. 20135633,  
834 pp. 321–342). CRC Press. <https://doi.org/10.1201/b14859-16>
- 835 Horst, N. K., & Laubach, M. (2013). Reward-related activity in the medial prefrontal cortex is  
836 driven by consumption. *Frontiers in Neuroscience*, 7.  
837 <https://doi.org/10.3389/fnins.2013.00056>
- 838 Hull, C.L. (1943). *Principles of Behavior* (Vol. 422). New York: Appleton-Century-Crofts.
- 839 Hulse, S. H., Snyder, H. L., & Bacon, W. E. (1960). Instrumental licking behavior as a function of  
840 schedule, volume, and concentration of a saccharine reinforcer. *Journal of Experimental*  
841 *Psychology*, 60(6), 359–364. <https://doi.org/10.1037/h0045841>
- 842 Izquierdo, A. (2017). Functional heterogeneity within rat orbitofrontal cortex in reward learning  
843 and decision making. *Journal of Neuroscience*, 37(44), 10529–10540.  
844 <https://doi.org/10.1523/JNeurosci.1678-17.2017>
- 845 Jarovi, J., Volle, J., Yu, X., Guan, L., & Takehara-Nishiuchi, K. (2018). Prefrontal theta  
846 oscillations promote selective encoding of behaviorally relevant events. *eNeuro*, 5(6).  
847 <https://doi.org/10.1523/Eneuro.0407-18.2018>
- 848 Kaplan, J. M., Baird, J. P., & Grill, H. J. (2001). Dissociation of licking and volume intake  
849 controls in rats ingesting glucose and maltodextrin. *Behavioral neuroscience*, 115(1),  
850 188.

- 851 Kesner, R. P., & Gilbert, P. E. (2007). The role of the agranular insular cortex in anticipation of  
852 reward contrast. *Neurobiology of Learning and Memory*, 88(1), 82–86.  
853 <https://doi.org/10.1016/j.nlm.2007.02.002>
- 854 Klimesch, W., Sauseng, P., Hanslmayr, S., Gruber, W., & Freunberger, R. (2007). Event-related  
855 phase reorganization may explain evoked neural dynamics. *Neuroscience and*  
856 *biobehavioral reviews*, 31(7), 1003–1016.  
857 <https://doi.org/10.1016/j.neubiorev.2007.03.005>
- 858 Kopell, N., Kramer, M. A., Malerba, P., & Whittington, M. A. (2010). Are different rhythms good  
859 for different functions?. *Frontiers in human neuroscience*, 4, 187.  
860 <https://doi.org/10.3389/fnhum.2010.00187>
- 861 Laubach, M., Amarante, L. M., Swanson, K., & White, S. R. (2018). What, if anything, is rodent  
862 prefrontal cortex? *Eneuro*, 5(5). <https://doi.org/10.1523/Eneuro.0315-18.2018>
- 863 Laubach, M., Caetano, M. S., & Narayanan, N. S. (2015). Mistakes were made: Neural  
864 mechanisms for the adaptive control of action initiation by the medial prefrontal cortex.  
865 *Journal of Physiology-Paris*, 109(1–3), 104–117.  
866 <https://doi.org/10.1016/j.jphysparis.2014.12.001>
- 867 Levy, D. J., & Glimcher, P. W. (2011). Comparing apples and oranges: using reward-specific  
868 and reward-general subjective value representation in the brain. *Journal of*  
869 *Neuroscience*, 31(41), 14693–14707. <https://doi.org/10.1523/JNeurosci.2218-11.2011>
- 870 Levy, D. J., & Glimcher, P. W. (2012). The root of all value: A neural common currency for  
871 choice. *Current Opinion in Neurobiology*, 22(6), 1027–1038.  
872 <https://doi.org/10.1016/j.conb.2012.06.001>
- 873 Lin, J.-Y., Roman, C., & Reilly, S. (2009). Insular cortex and consummatory successive negative  
874 contrast in the rat. *Behavioral Neuroscience*, 123(4), 810–814.  
875 <https://doi.org/10.1037/a0016460>
- 876 Lockmann, A., & Tort, A. (2018). Nasal respiration entrains delta-frequency oscillations in the  
877 prefrontal cortex and hippocampus of rodents. *Brain structure & function*, 223(1), 1–3.  
878 <https://doi.org/10.1007/s00429-017-1573-1>
- 879 Montague, P. R., & Berns, G. S. (2002). Neural economics and the biological substrates of  
880 valuation. *Neuron*, 36(2), 265–284. [https://doi.org/10.1016/S0896-6273\(02\)00974-1](https://doi.org/10.1016/S0896-6273(02)00974-1)
- 881 Narayanan, N. S., Cavanagh, J. F., Frank, M. J., & Laubach, M. (2013). Common medial frontal  
882 mechanisms of adaptive control in humans and rodents. *Nature Neuroscience*, 16(12),  
883 1888–1895. <https://doi.org/10.1038/nn.3549>
- 884 Öngür, D., & Price, J. L. (2000). The organization of networks within the orbital and medial  
885 prefrontal cortex of rats, monkeys and humans. *Cerebral cortex*, 10(3), 206–219.  
886 <https://doi.org/10.1093/cercor/10.3.206>
- 887 Padoa-Schioppa, C. (2011). Neurobiology of economic choice: A good-based model. *Annual*  
888 *Review of Neuroscience*, 34(1), 333–359. <https://doi.org/10.1146/annurev-neuro-061010-113648>
- 890 Padoa-Schioppa, C., & Assad, J. A. (2006). Neurons in the orbitofrontal cortex encode  
891 economic value. *Nature*, 441(7090), 223–226. <https://doi.org/10.1038/nature04676>

- 892 Padoa-Schioppa, C., & Assad, J. A. (2008). The representation of economic value in the  
893 orbitofrontal cortex is invariant for changes of menu. *Nature Neuroscience*, 11(1), 95–  
894 102. <https://doi.org/10.1038/nn2020>
- 895 Parent, M. A., Amarante, L. M., Liu, B., Weikum, D., & Laubach, M. (2015a). The medial  
896 prefrontal cortex is crucial for the maintenance of persistent licking and the expression of  
897 incentive contrast. *Frontiers in Integrative Neuroscience*, 9.  
898 <https://doi.org/10.3389/fnint.2015.00023>
- 899 Parent, M. A., Amarante, L. M., Swanson, K., & Laubach, M. (2015b). Cholinergic and  
900 ghrelinergic receptors and KCNQ channels in the medial PFC regulate the expression of  
901 palatability. *Frontiers in behavioral neuroscience*, 9, 284.  
902 <https://doi.org/10.3389/fnbeh.2015.00284>
- 903 Passingham, R. E., & Wise, S. P. (2012). *The neurobiology of the prefrontal cortex: Anatomy,*  
904 *evolution, and the origin of insight*. Oxford University Press.
- 905 Paxinos, G., & Watson, C. (2013). *The rat brain in stereotaxic coordinates*. Seventh Edition.  
906 Elsevier Academic Press.
- 907 Petykó, Z., Gálosi, R., Tóth, A., Máté, K., Szabó, I., Szabó, I., Karádi, Z., & Lénárd, L. (2015).  
908 Responses of rat medial prefrontal cortical neurons to pavlovian conditioned stimuli and  
909 to delivery of appetitive reward. *Behavioural Brain Research*, 287, 109–119.  
910 <https://doi.org/10.1016/j.bbr.2015.03.034>
- 911 Petykó, Z., Tóth, A., Szabó, I., Gálosi, R., & Lénárd, L. (2009). Neuronal activity in rat medial  
912 prefrontal cortex during sucrose solution intake: *NeuroReport*, 20(14), 1235–1239.  
913 <https://doi.org/10.1097/WNR.0b013e32832fbf30>
- 914 Pratt, W. E., & Mizumori, S. J. Y. (2001). Neurons in rat medial prefrontal cortex show  
915 anticipatory rate changes to predictable differential rewards in a spatial memory task.  
916 *Behavioural Brain Research*, 123(2), 165–183. [https://doi.org/10.1016/S0166-](https://doi.org/10.1016/S0166-4328(01)00204-2)  
917 [4328\(01\)00204-2](https://doi.org/10.1016/S0166-4328(01)00204-2)
- 918 Rangel, A., Camerer, C., & Montague, P. R. (2008). A framework for studying the neurobiology  
919 of value-based decision making. *Nature Reviews Neuroscience*, 9(7), 545-556.
- 920 Rangel, A. (2013). Regulation of dietary choice by the decision-making circuitry. *Nature*  
921 *Neuroscience*, 16(12), 1717–1724. <https://doi.org/10.1038/nn.3561>
- 922 Riceberg, J. S., & Shapiro, M. L. (2017). Orbitofrontal cortex signals expected outcomes with  
923 predictive codes when stable contingencies promote the integration of reward history.  
924 *Journal of Neuroscience*, 37(8), 2010–2021. [https://doi.org/10.1523/JNeurosci.2951-](https://doi.org/10.1523/JNeurosci.2951-16.2016)  
925 [16.2016](https://doi.org/10.1523/JNeurosci.2951-16.2016)
- 926 Saez, R. A., Saez, A., Paton, J. J., Lau, B., & Salzman, C. D. (2017). Distinct roles for the  
927 amygdala and orbitofrontal cortex in representing the relative amount of expected  
928 reward. *Neuron*, 95(1), 70-77.e3. <https://doi.org/10.1016/j.neuron.2017.06.012>
- 929 Sauseng, P., Klimesch, W., Gruber, W. R., Hanslmayr, S., Freunberger, R., & Doppelmayr, M.  
930 (2007). Are event-related potential components generated by phase resetting of brain  
931 oscillations? A critical discussion. *Neuroscience*, 146(4), 1435–1444.  
932 <https://doi.org/10.1016/j.neuroscience.2007.03.014>

- 933 Schoenbaum, G., & Roesch, M. (2005). Orbitofrontal cortex, associative learning, and  
934 expectancies. *Neuron*, 47(5), 633–636. <https://doi.org/10.1016/j.neuron.2005.07.018>
- 935 Schoenbaum, G., Roesch, M. R., Stalnaker, T. A., & Takahashi, Y. K. (2009). A new  
936 perspective on the role of the orbitofrontal cortex in adaptive behaviour. *Nature Reviews*  
937 *Neuroscience*, 10(12), 885–892. <https://doi.org/10.1038/nrn2753>
- 938 Sclafani, A., Hertwig, H., Vigorito, M., & Feigin, M. B. (1987). Sex differences in polysaccharide  
939 and sugar preferences in rats. *Neuroscience and biobehavioral reviews*, 11(2), 241–251.  
940 [https://doi.org/10.1016/s0149-7634\(87\)80032-5](https://doi.org/10.1016/s0149-7634(87)80032-5)
- 941 Simon, N. W., Wood, J., & Moghaddam, B. (2015). Action-outcome relationships are  
942 represented differently by medial prefrontal and orbitofrontal cortex neurons during  
943 action execution. *Journal of Neurophysiology*, 114(6), 3374–3385.  
944 <https://doi.org/10.1152/jn.00884.2015>
- 945 Siniscalchi, M. J., Wang, H., & Kwan, A. C. (2019). Enhanced population coding for rewarded  
946 choices in the medial frontal cortex of the mouse. *Cerebral Cortex*, 29(10), 4090–4106.
- 947 Spence, K.W. (1956). *Behavior Theory and Conditioning*.
- 948 Strait, C. E., Blanchard, T. C., & Hayden, B. Y. (2014). Reward value comparison via mutual  
949 inhibition in ventromedial prefrontal cortex. *Neuron*, 82(6), 1357–1366.  
950 <https://doi.org/10.1016/j.neuron.2014.04.032>
- 951 Sugrue, L. P., Corrado, G. S., & Newsome, W. T. (2005). Choosing the greater of two goods:  
952 Neural currencies for valuation and decision making. *Nature Reviews Neuroscience*,  
953 6(5), 363–375. <https://doi.org/10.1038/nrn1666>
- 954 Sul, J. H., Jo, S., Lee, D., & Jung, M. W. (2011). Role of rodent secondary motor cortex in  
955 value-based action selection. *Nature Neuroscience*, 14(9), 1202–1208.  
956 <https://doi.org/10.1038/nn.2881>
- 957 Swanson, K., Goldbach, H. C., & Laubach, M. (2019). The rat medial frontal cortex controls  
958 pace, but not breakpoint, in a progressive ratio licking task. *Behavioral neuroscience*,  
959 133(4), 385–397. <https://doi.org/10.1037/bne0000322>
- 960 Travers, J. B., Dinardo, L. A., & Karimnamazi, H. (1997). Motor and premotor mechanisms of  
961 licking. *Neuroscience and Biobehavioral Reviews*, 21(5), 631–647.  
962 [https://doi.org/10.1016/S0149-7634\(96\)00045-0](https://doi.org/10.1016/S0149-7634(96)00045-0)
- 963 Tremblay, L., & Schultz, W. (1999). Relative reward preference in primate orbitofrontal cortex.  
964 *Nature*, 398(6729), 704–708. <https://doi.org/10.1038/19525>
- 965 Uchida, N., & Mainen, Z. F. (2003). Speed and accuracy of olfactory discrimination in the rat.  
966 *Nature Neuroscience*, 6(11), 1224–1229. <https://doi.org/10.1038/nn1142>
- 967 van Duuren, E., van der Plasse, G., Lankelma, J., Joosten, R. N. J. M. A., Feenstra, M. G. P., &  
968 Pennartz, C. M. A. (2009). Single-cell and population coding of expected reward  
969 probability in the orbitofrontal cortex of the rat. *Journal of Neuroscience*, 29(28), 8965–  
970 8976. <https://doi.org/10.1523/JNeurosci.0005-09.2009>
- 971 van Wingerden, M., Vinck, M., Lankelma, J., & Pennartz, C. M. A. (2010). Theta-band phase  
972 locking of orbitofrontal neurons during reward expectancy. *Journal of Neuroscience*,  
973 30(20), 7078–7087. <https://doi.org/10.1523/JNeurosci.3860-09.2010>

- 974 Webber, E. S., Chambers, N. E., Kostek, J. A., Mankin, D. E., & Cromwell, H. C. (2015).  
975 Relative reward effects on operant behavior: Incentive contrast, induction and variety  
976 effects. *Behavioural Processes*, 116, 87–99.  
977 <https://doi.org/10.1016/j.beproc.2015.05.003>
- 978 Weijnen, J. (1998). Licking behavior in the rat: Measurement and situational control of licking  
979 frequency. *Neuroscience and Biobehavioral Reviews*, 22(6), 751–760.  
980 [https://doi.org/10.1016/S0149-7634\(98\)00003-7](https://doi.org/10.1016/S0149-7634(98)00003-7)
- 981 Widmann, A., & Schröger, E. (2012). Filter effects and filter artifacts in the analysis of  
982 electrophysiological data. *Frontiers in Psychology*, 3.  
983 <https://doi.org/10.3389/fpsyg.2012.00233>
- 984 Womelsdorf, T., Vinck, M., Leung, L. S., & Everling, S. (2010). Selective theta-synchronization  
985 of choice-relevant information subserves goal-directed behavior. *Frontiers in Human*  
986 *Neuroscience*, 4. <https://doi.org/10.3389/fnhum.2010.00210>
- 987 Yoshida, A., Taki, I., Chang, Z., Iida, C., Haque, T., Tomita, A., Seki, S., Yamamoto, S.,  
988 Masuda, Y., Moritani, M., & Shigenaga, Y. (2009). Corticofugal projections to trigeminal  
989 motoneurons innervating antagonistic jaw muscles in rats as demonstrated by  
990 anterograde and retrograde tract tracing. *The Journal of comparative neurology*, 514(4),  
991 368–386. <https://doi.org/10.1002/cne.22013>



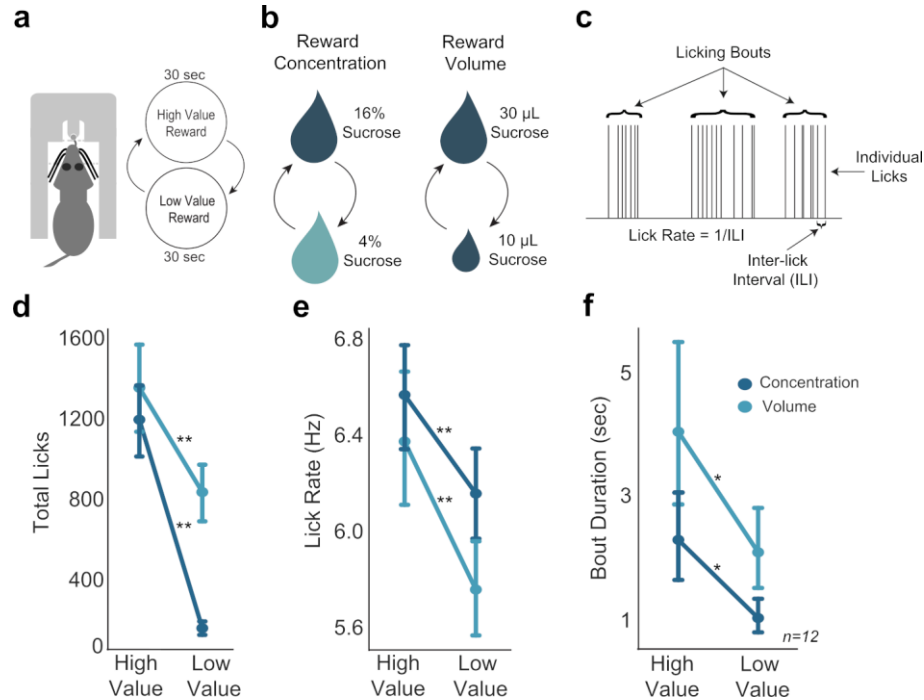

**Figure 1. Consummatory behavior tracked shifts in sucrose concentration and fluid volume.** A. In the Shifting Values Licking Task, rats received access to one of two values of reward, with rewards alternating every 30 sec. B. Manipulation of reward value by changing either concentration or volume. C. Types of behavioral licking measurements recorded in all licking tasks. D,E,F. Rats licked more (D), faster (E), and over longer bouts (F) for the high concentration and large volume rewards. Single asterisk (\*) denotes  $p < 0.05$ ; Double asterisk (\*\*) denotes  $p < 0.001$ . Error bars represent 95% confidence intervals.

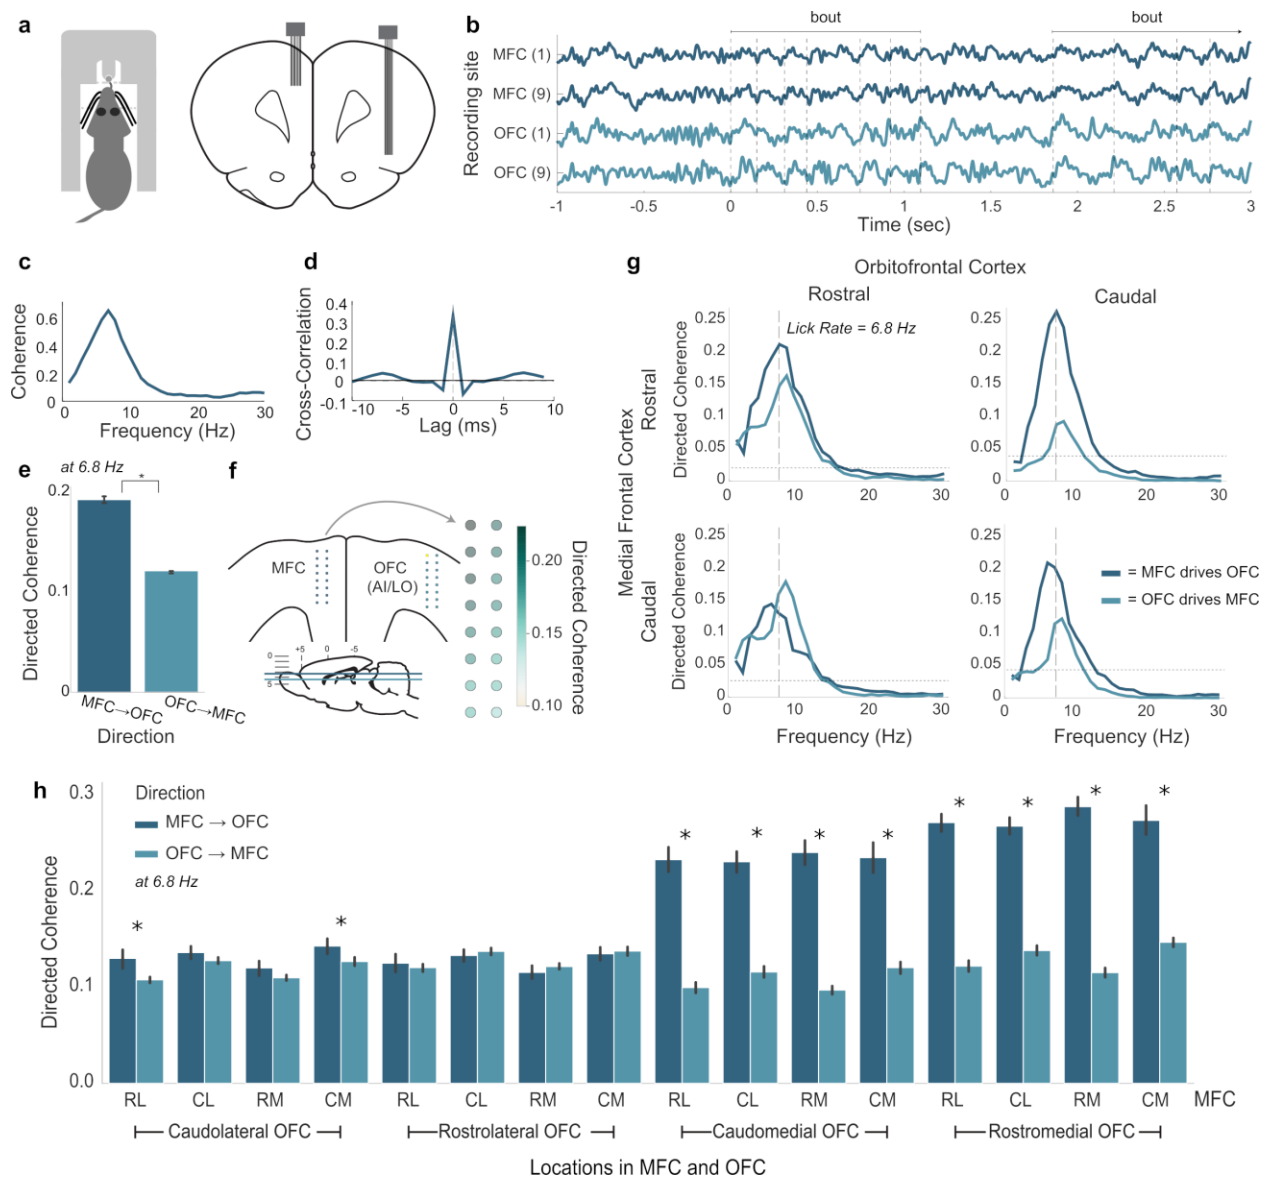

**Figure 2. Coherent licking-related theta-band activity in the medial and orbital frontal cortices.** A. Depiction of rat performing the Shifting Values Licking Task (left) and placement of recording arrays in the medial and lateral frontal cortices (right). B. Traces of simultaneous LFP recordings from rostral (1) and caudal (9) recording sites on arrays implanted in MFC and OFC. Two licking bouts are noted and the times of licks are shown as dashed vertical lines. C. Standard (non-directional) coherence between a pair of LFPs from MFC and OFC showed a peak near the licking frequency (~7 Hz). D. Cross-correlation (time domain) showed a central peak with lag near 0 ms. E. Directed coherence at the licking frequency for MFC→OFC and OFC→MFC over all pairs of LFPs recorded in 4 rats. Asterisk denotes  $p < 10^{-6}$  for effect of direction on coherence. F. Anatomical map of directed coherence values over one of the arrays. G. Directed coherence over frequencies up to 30 Hz, plotted for rostral and caudal sites in the MFC and OFC (panel B). H. Group summary of directed coherence over all pairs of recordings. Asterisks (\*) denotes  $p < 0.05$ . Error bars represent 95% confidence intervals.

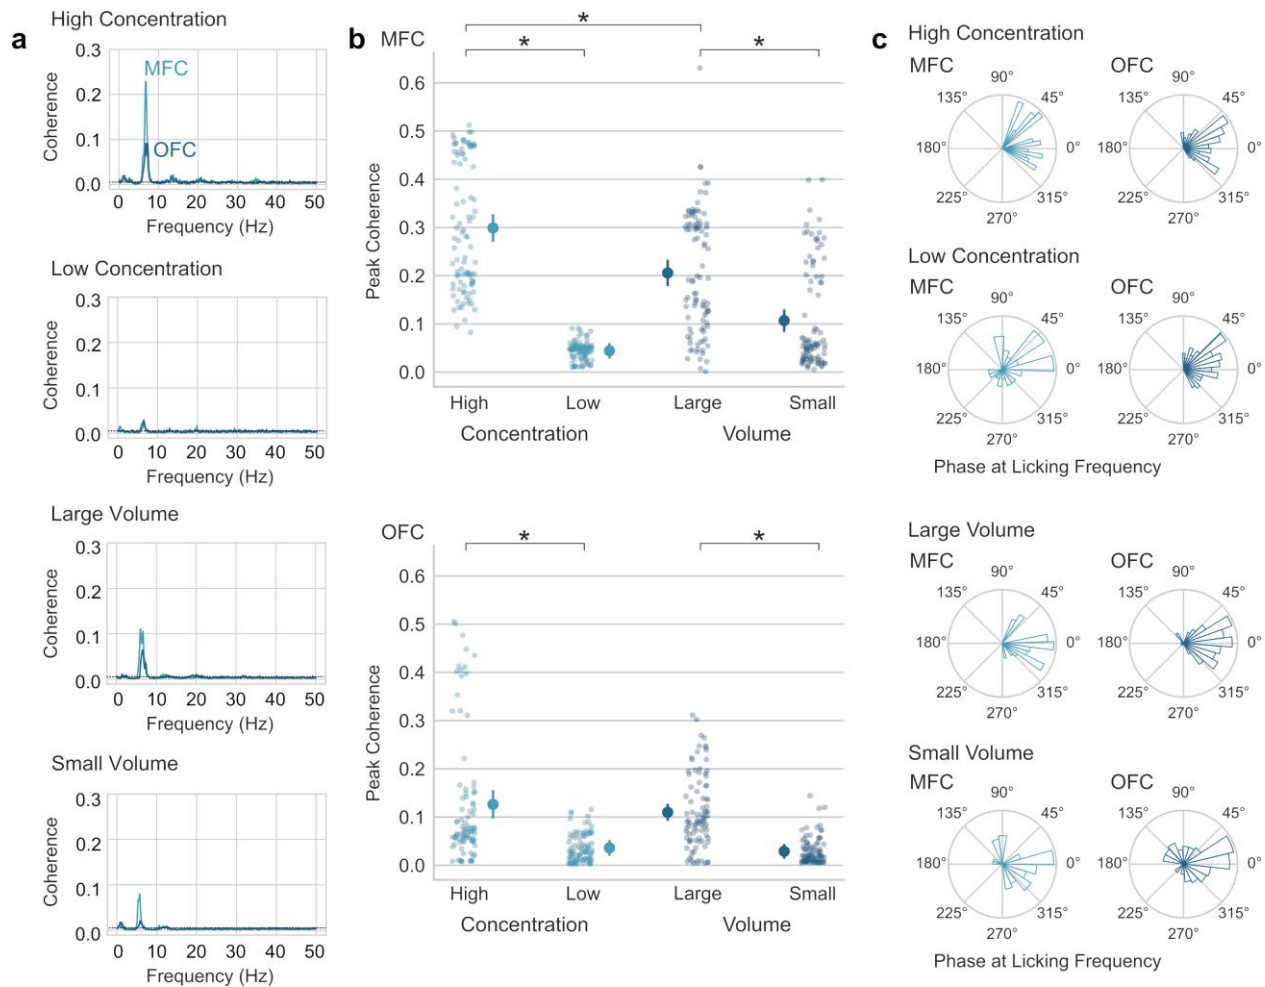

**Figure 3. Lick-entrainment in the medial and orbital frontal cortices is sensitive to reward value.** A. Average lick-field coherence for LFPs in MFC and OFC and licks for high and low concentration sucrose solutions and large and small fluid volumes. B. Peak coherence in the range of theta (4-12 Hz) for LFPs from MFC and OFC and licks for high and low concentration sucrose solutions and large and small fluid volumes. Asterisks (\*) denotes  $p < 0.05$ . Error bars represent 95% confidence intervals. C. Phase angles of LFPs at the licking frequency. Most LFPs were coherent with licks at phases between 45 and 315 degrees.

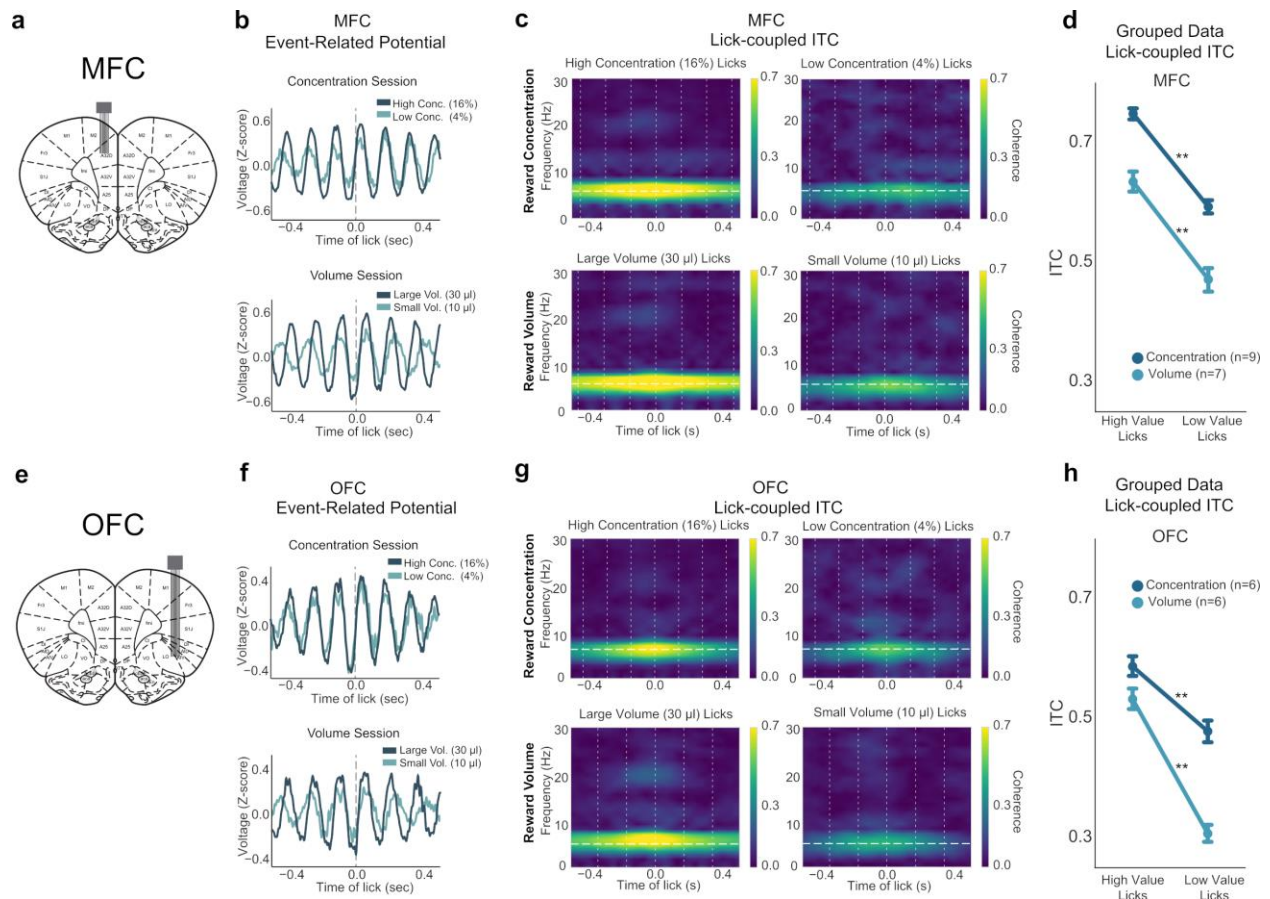

**Figure 4. Lick-entrained neural activity in MFC and OFC tracked shifts in sucrose concentration and fluid volume.** A,E. Rats were implanted with a 2x8 electrode array in either MFC (A) or OFC (E); representative coronal sections are shown. B,F. Event-related potentials during concentration and volume manipulation sessions in the Shifting Values Licking Task for MFC (B) and OFC (F). C,G. Spectral ITC time-frequency plots revealed strong phase locking during licks for the high concentration and large volume (left sides) rewards in both MFC (C) and OFC (G). Plots are from one electrode from one individual animal. ITC is consistently strongest around 4-8 Hz. D,H. Grouped data from all rats in both concentration and volume sessions in MFC (D) and OFC (H) showed strongest ITC during licks for the high value reward. Double asterisk (\*\*) denotes  $p < 0.001$ . Error bars represent 95% confidence intervals.

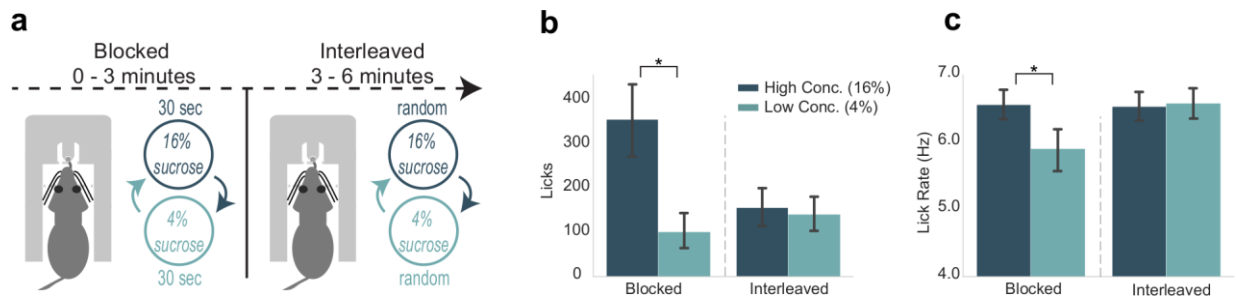

**Figure 5. Engagement in and the vigor of licking varied with reward expectation.** A. Rats participated in a modification of the Shifting Values Licking Task, called the Blocked-Interleaved Task, in which they received alternating access to high and low concentrations of liquid sucrose for three minutes and then received interleaved (and thus unpredictable) presentations of the two levels of sucrose for the rest of the session. B. Total licks emitted, a measure of task engagement, for both high and low concentration rewards during the blocked and interleaved portion of the task. Rats licked less for both rewards when rewards were randomly interleaved. C. Lick rate, a measure of response vigor, was similar for both rewards in the interleaved, but not blocked, portion of the task. Asterisk denotes  $p < 0.05$ . Error bars represent 95% confidence intervals.

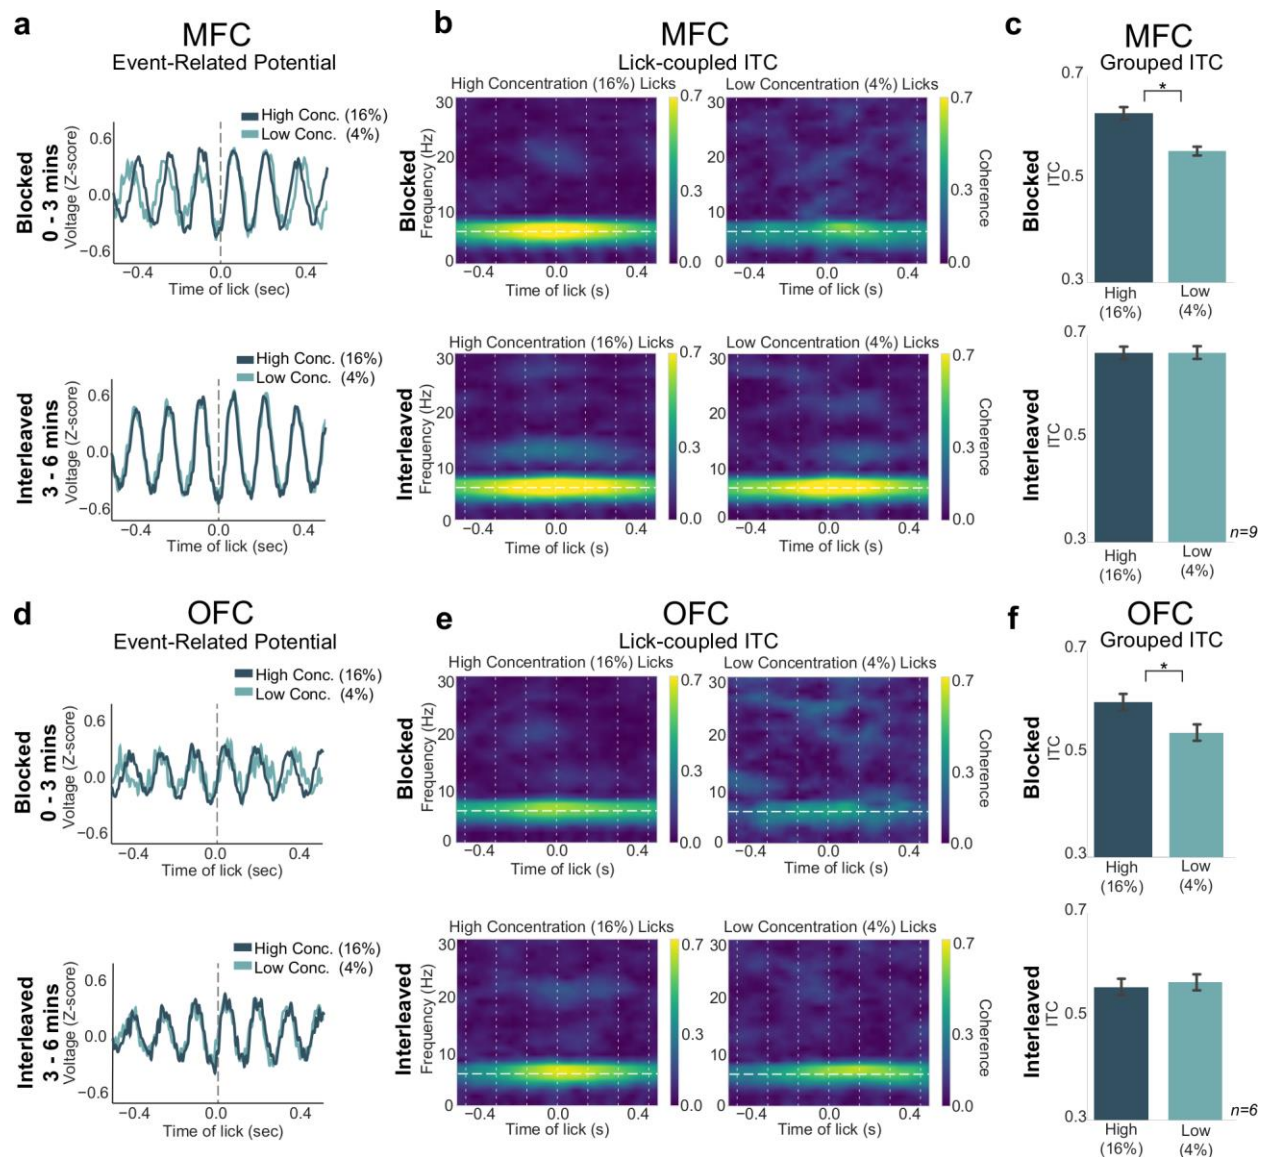

**Figure 6. Lick-entrained neural activity varied with reward expectation.** A,D. ERPs for licks of both rewards in MFC (A) and OFC (D) remain unchanged during the interleaved portion of the task. B,E. Spectral ITC plots revealed stronger 4-8 Hz phase-locking during licks for the high concentration reward in the blocked portion (top), but phase-locking during licks for high and low concentration rewards in the interleaved portion were indistinguishable from each other. C,F. Grouped data revealed no difference in ITC values during high or low concentration licks in the interleaved phase. Asterisk denotes  $p < 0.05$ . Error bars represent 95% confidence intervals.

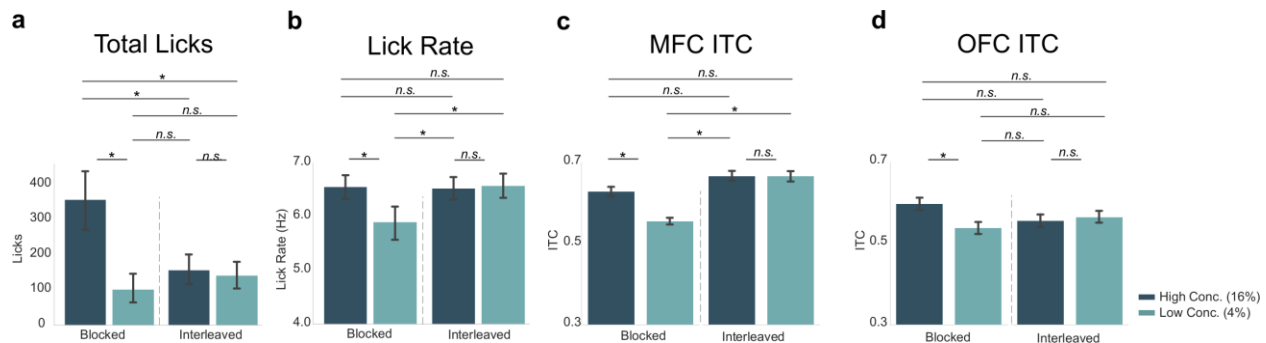

**Figure 7. Neural activity in MFC, but not OFC, varied with the lick rate (vigor) and not task engagement (total licks).** Post-hoc contrasts of statistically significant effects revealed by two-way ANOVA. Direct comparison of behavioral measures (A – total licks; B – lick rate) with MFC ITCs (C) and OFC ITCs (D) showed a similar pattern (and identical post-hoc statistical contrasts) between lick rate (B) and MFC ITCs (C). The pattern of post-hoc contrasts for OFC ITCs (D) did not match either total licks or lick rate. Asterisk denotes  $p < 0.05$ . Error bars represent 95% confidence intervals.

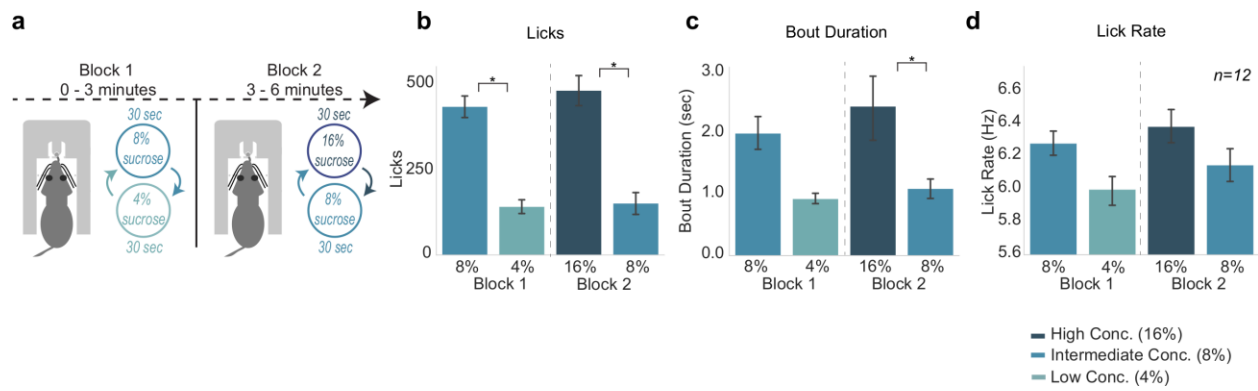

**Figure 8. Consummatory behavior tracked relative differences in reward value.** A. The Three Reward Task is a variation of Shifting Values Licking Task but with a third reward introduced. In the first block of the task, rats experience the intermediate (8%) reward and low (4%) reward. In block 2, rats experience the high (16%) reward paired with the intermediate (8%) reward. B. Rats licked more for the sweeter reward in each block. C. Rats showed greater bout durations for the sweeter reward. D. Lick rate showed a similar pattern to licks and bout duration, but was not statistically significant. Asterisk denotes  $p < 0.05$ . Error bars represent 95% confidence intervals.



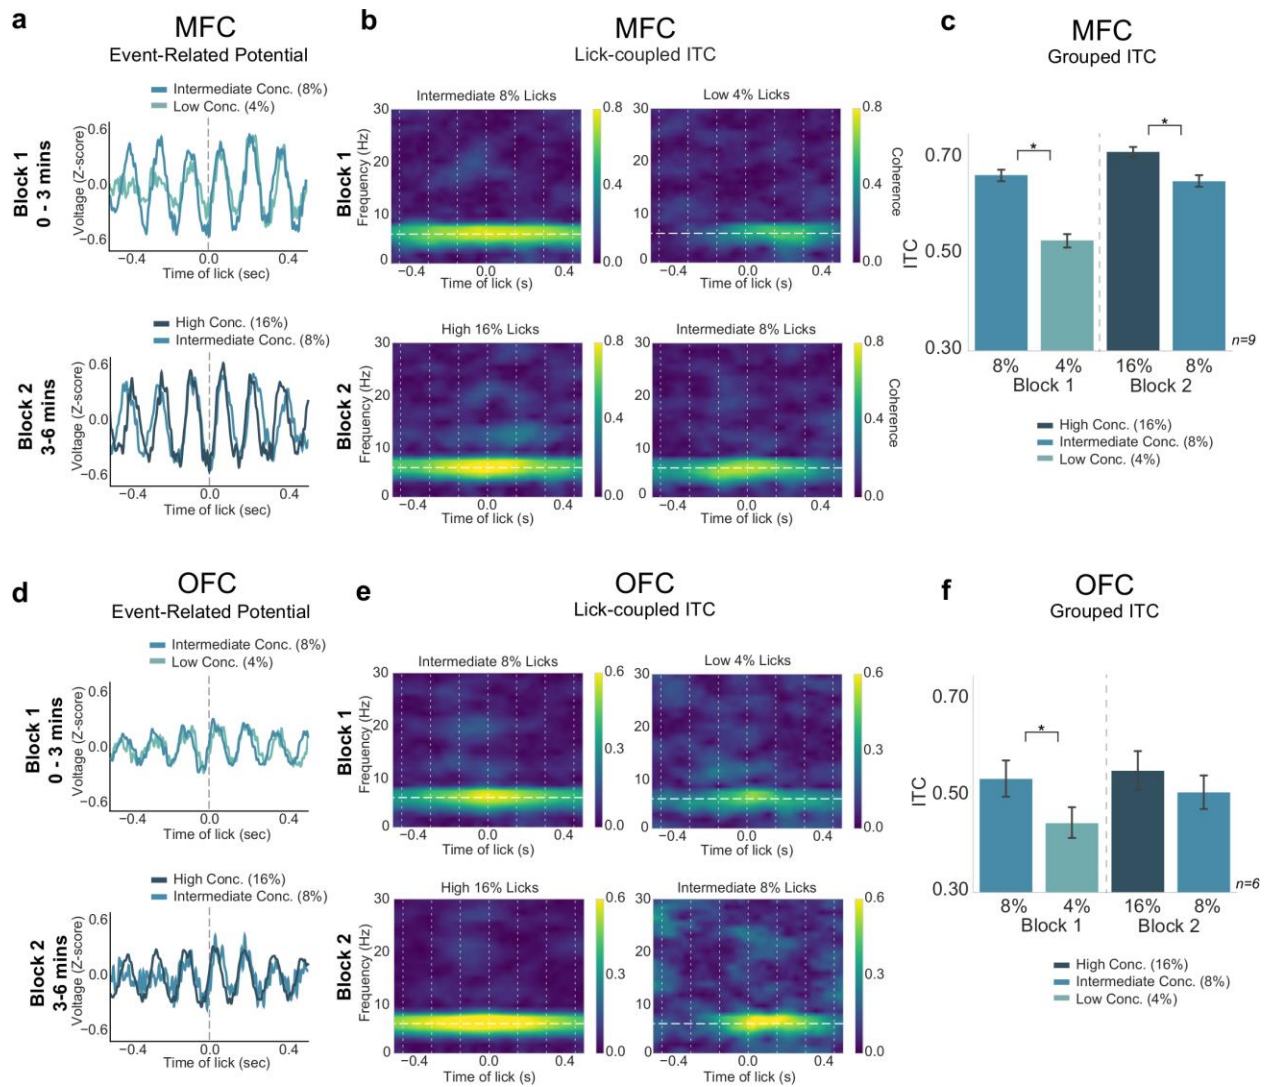

**Figure 9. Neural activity in MFC, but not OFC, tracked absolute differences in reward value.** A,D. ERPs for each block of the task from MFC (A) and OFC (D). B,E. ITC values in MFC (B) and OFC (E) showed strongest 4-8 Hz phase locking for the “high value” reward in each block. C,F. Group data revealed significantly greater ITC values for the high value reward in each block for MFC ITCs (C), and a similar pattern was found in OFC (F) but only block 1 rewards were significantly different. Asterisk denotes  $p < 0.05$ . Error bars represent 95% confidence intervals.

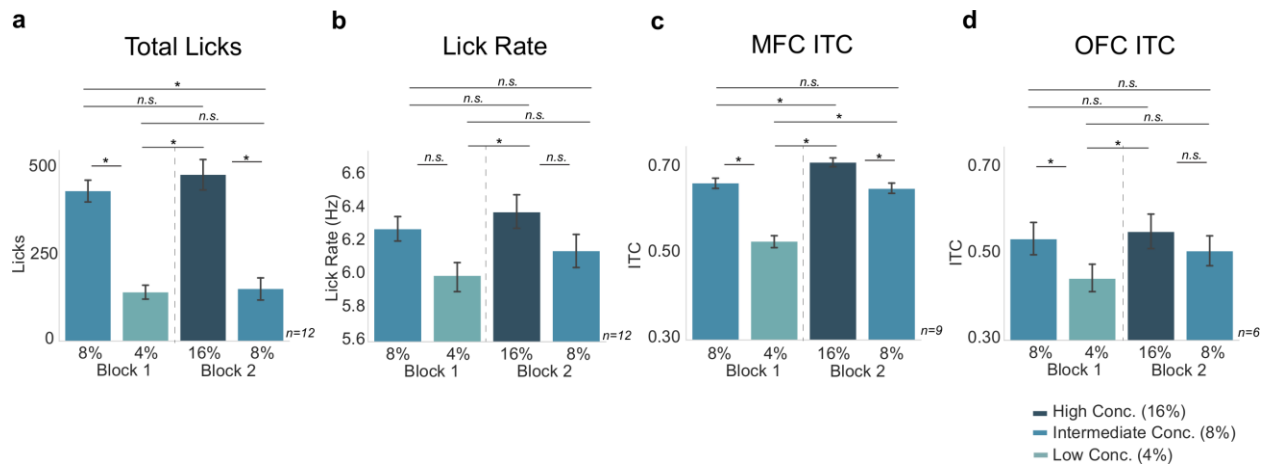

**Figure 10. Neural activity in MFC, but not OFC, varied with effects of absolute reward value on lick rate (vigor) and task engagement (total licks).** A,B. Behavioral measures replotted with significance bars for each combination reward. MFC ITCs (C) did not show the exact same pattern as lick rate, which is different from Figure 5. OFC ITCs (D) did not look like total licks or lick rate. Asterisk denotes  $p < 0.05$ . Error bars represent 95% confidence intervals.

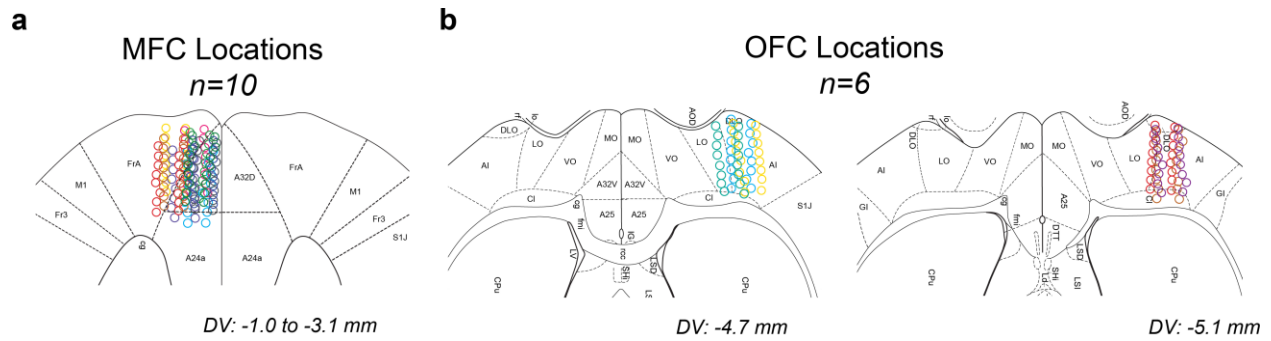

From Paxinos and Watson's *The Rat Brain in Stereotaxic Coordinates* 7th Edition

**Figure 1 - figure supplement 1. Electrode localization.** Locations of all electrodes plotted in the horizontal plane. A. MFC (*n*=10 rats; 160 electrodes) electrode arrays were localized around area 32 (A32D) and M2 (FrA) from 1 to 3 mm ventral from the brain's surface. B. OFC (*n*=6 rats; 96 electrodes) electrode arrays were localized around agranular insular (AI) and lateral orbital (LO) areas of OFC from 4.7 to 5.1 mm ventral from the brain's surface. Reconstructions were plotted over atlas figures from Paxinos and Watson's *The Rat Brain in Stereotaxic Coordinates*, 7<sup>th</sup> edition (2013).

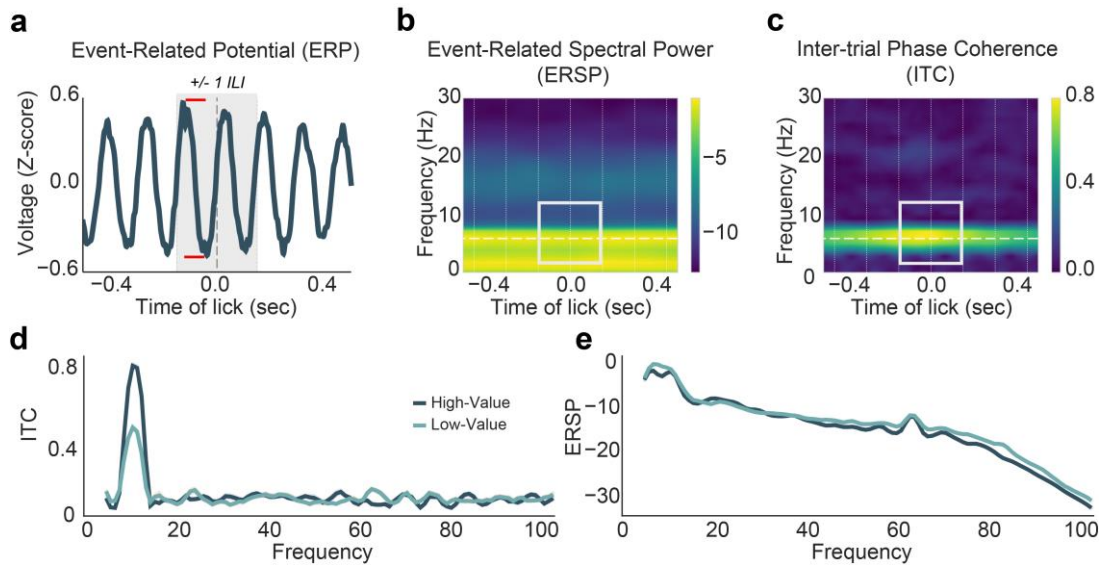

**Figure 4 - figure supplement 1. Electrophysiological Measures Used to Assess LFP Activity.** A. Event-related potentials (ERPs) were recorded around licks (time 0) after LFP activity was filtered and z-scored. Peak-to-peak analysis was performed on the ERP centered around each lick with a +1 inter-lick interval (ILI) window to calculate the amplitude size (red limits = maximum minus the minimum amplitude of the ERP). B,C. Spectral measures of power (B) and phase (C). Grouped statistics were based on the mean maximum Event-Related Spectral Power (ERSP) and Inter-Trial phase Coherence (ITC) value from 2-12 Hz and around +1 ILI (grey window). Vertical lines denote the rat's average ILIs. Horizontal line denotes the rat's median lick rate. D. Maximum ITC values over frequencies from 0-100 Hz from all 16 MFC electrodes from one example rat. E. Maximum ERSP measures over frequencies from 0-100 Hz in all 16 MFC electrodes from one

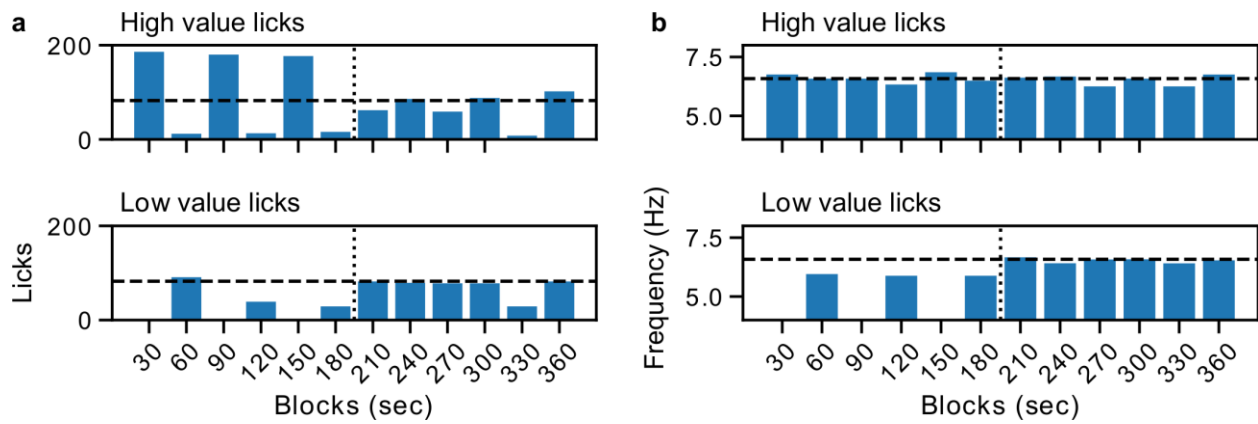

**Figure 5 - figure supplement 1. Transitions in licking behavior in the Blocked-Interleaved experiment.** Sessions were split into sequential 30 sec windows and the various measures of licking behavior were plotted. An example from one of the rats is shown here. The plots in panel A depict high and low value licks per block, and the dashed line is the mean number of high value licks over all blocks. The plots in panel B show licking frequency for the high and low value fluids, and the dashed line is the median licking rate for the high value fluid over all blocks. There was a clear breakpoint in licks emitted and the licking frequency at the transition from blocked to interleaved presentations of the rewards (vertical dashed line). Licking frequency was lower when rats licked for the lower value fluid when it was presented in the blocked part of the test sessions, and then increased to the same frequency as when they licked for the higher value fluid in the interleaved part of the test sessions. Total licks were higher for the higher value fluid when it was presented in blocks compared to the interleaved part of the session. Licks for the lower value fluid increased starting from the onset of the interleaved part of the session.

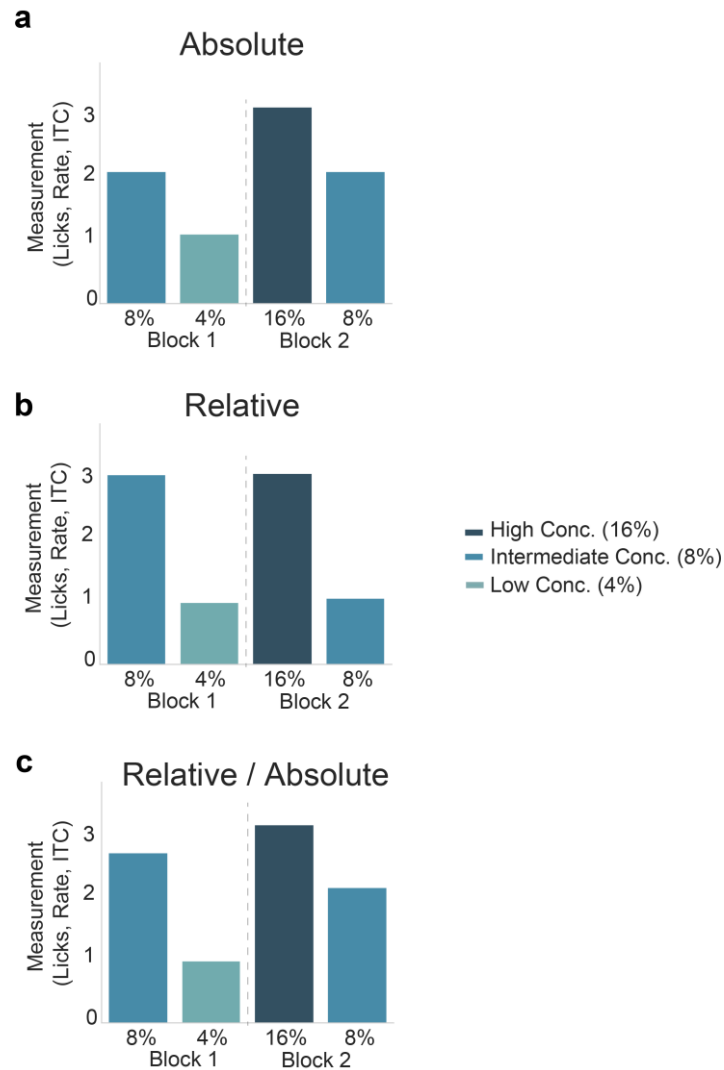

**Figure 10 - figure supplement 1. Hypothesis for Relative versus Absolute Encoding of Reward Value.** A. If rewards are processed in an absolute manner, we expected to see a graded expression (in lick counts, lick rate, bout duration, or ITC values) of reward value where the high (16%) concentration reward expression is greatest, followed by equal expression of the intermediate (8%) reward and then low expression of the low (4%) concentration reward. B. If rewards are processed in a relative manner, we expected to see a comparative process of rewards, where the “high value” (8% in block 1 or 16% in block 2) are processed similarly, and the focus is on the comparison within each block or context. C. An alternative hypothesis which incorporates a combination of relative and absolute processing of reward value, with partially mixed results of each process in A and B.

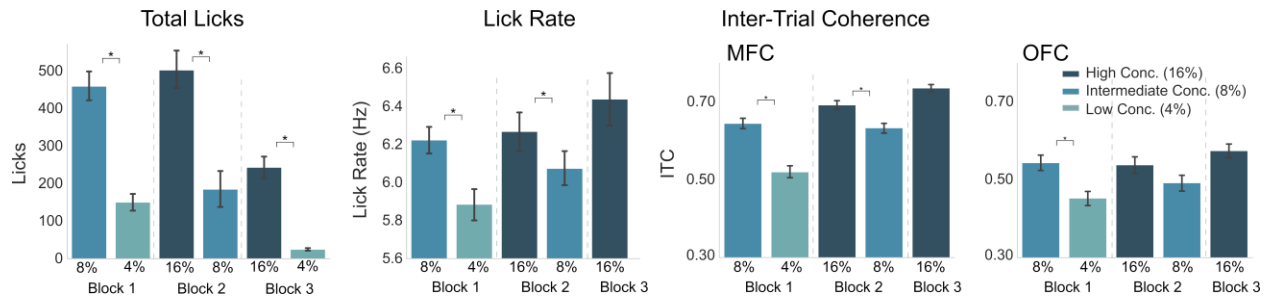

**Figure 10 - figure supplement 2. Third Block of Testing in the Three Reward Task.** In the third block of the three reward task, rats received access to 16% and 4% sucrose. In this block, licks for 16% sucrose can be compared against licks for both 4% and 8%, and likewise the licks for 8% sucrose can be compared against licks for 4% and 16%. The goal was to attempt to examine if MFC or OFC indeed tracked value in an absolute manner. Overall, rats greatly decreased the number of licks emitted for the 4% sucrose during Block 3 and therefore we could not examine their subsequent electrophysiological findings. However, almost all rats ( $n=8$  in MFC, and  $n=5$  in OFC) emitted at least the minimum criteria of licks for 16% sucrose. Behaviorally, rats emitted more licks for the high value (16%) sucrose in Block 3 as opposed to licks for the low value (4%) sucrose in Block 3 ( $p<0.005$ ), although there was no difference in total licks emitted for Block 3 high value versus Block 2 intermediate value. There was a significant decrease in the Block 3 high value licks as opposed to Block 2 high value licks ( $p<0.001$ ). Lick rate was also re-analyzed including Block 3 high value licks, but lick rate for low value (4%) licks could not be analyzed due to a low number of licks not passing criteria. Lick rate for Block 3 high value licks were not significantly different from Block 2 high value licks ( $p=0.99$ ), nor from Block 2 intermediate licks ( $p=0.83$ ). Statistics for MFC: Block 3 High value ITCs [95% CI: 0.716, 0.757] were not significantly different from Block 2 High value ITCs ( $p=0.113$ ) [95% CI: 0.671, 0.715]. Block 3 High value ITCs were significantly increased from both intermediate (8%) value ITCs in Block 1 [95% CI: 0.619, 0.672] and Block 2 [95% CI: 0.610, 0.658] ( $p<0.001$  for both). These findings support the hypothesis of MFC possibly encoding reward value in an absolute manner. Statistics for OFC: Block 3 High value ITCs [95% CI: 0.540, 0.611] were not significantly different from Block 2 High value ITCs ( $p=0.789$ ) [95% CI: 0.497, 0.580]. Block 3 High value ITCs were significantly increased from Block 2 Intermediate value ITCs ( $p=0.025$ ) [95% CI for intermediate Block 2: 0.450, 0.535], but Block 3 high value ITCs were not significantly different from Block 1 intermediate ITCs [Block 1 intermediate 95% CI: 0.505, 0.584]. The other comparisons (Block 2 intermediate versus Block 2 high value) were not significant ( $p=0.339$ ).
